1

# A TOOLBOX FOR DISCRETE MODELLING OF CELL

## SIGNALLING DYNAMICS

---

*Yasmin Z. Paterson<sup>1^</sup>, David Shorthouse<sup>2^</sup>, Markus W. Pleijzier<sup>2^</sup>, Nir Piterman<sup>3</sup>,  
Claus Bendtsen<sup>4</sup>, Benjamin A. Hall<sup>2\*</sup> & Jasmin Fisher<sup>1,5\*</sup>*

<sup>1</sup> Department of Biochemistry, University of Cambridge, Cambridge, CB2 1GA, UK

<sup>2</sup> MRC Cancer Unit, University of Cambridge, Cambridge, CB2 0XZ, UK

<sup>3</sup> Department of Informatics, University of Leicester, Leicester, LE1 7RH, UK

<sup>4</sup> Quantitative Biology, Discovery Sciences, IMED Biotech Unit, AstraZeneca,  
Cambridge, UK

<sup>5</sup> Microsoft Research, Cambridge, CB1 2FB, UK

<sup>^</sup>These authors contributed equally to this work

\*Correspondence and request for materials should be addressed to B.A.H  
([bh418@cam.ac.uk](mailto:bh418@cam.ac.uk)) or J.F. ([jf416@cam.ac.uk](mailto:jf416@cam.ac.uk))

6435 words

## 25 **ABSTRACT**

26 In an age where the volume of data regarding biological systems exceeds our  
 27 ability to analyse it, many researchers are looking towards systems biology  
 28 and computational modelling to help unravel the complexities of gene and  
 29 protein regulatory networks. In particular, the use of discrete modelling allows  
 30 generation of signalling networks in the absence of full quantitative  
 31 descriptions of systems, which are necessary for ordinary differential equation  
 32 (ODE) models. In order to make such techniques more accessible to  
 33 mainstream researchers, tools such as the BioModelAnalyzer (BMA) have  
 34 been developed to provide a user-friendly graphical interface for discrete  
 35 modelling of biological systems. Here we use the BMA to build a library of  
 36 discrete target functions of known canonical molecular interactions, translated  
 37 from ordinary differential equations (ODEs). We then show that these BMA  
 38 target functions can be used to reconstruct complex networks, which can  
 39 correctly predict many known genetic perturbations. This new library supports  
 40 the accessibility ethos behind the creation of BMA, providing a toolbox for the  
 41 construction of complex cell signalling models without the need for extensive  
 42 experience in computer programming or mathematical modelling, and allows  
 43 for construction and simulation of complex biological systems with only small  
 44 amounts of quantitative data. (199 words)

45

46

47

48

49

## AUTHOR SUMMARY

Ordinary differential equation (ODE) based models are a popular approach for modelling biological networks. A limitation of ODE models is that they require complete networks and detailed kinetic parameterisation. An alternative is the use of discrete, executable models, in which nodes are assigned discrete value ranges, and the relationship between them defined with simple mathematical operations. One tool for constructing such models is the BioModelAnalyzer (BMA), an open source and publicly available ([www.biomodelanalyzer.org](http://www.biomodelanalyzer.org)) software, aimed to be fully usable by researchers without extensive computational or mathematical experience. A fundamental question for executable models is whether the high level of abstraction substantially reduces expressivity relative to continuous approaches. Here, we present a canonical library of biological signalling motifs, initially defined by Tyson et al (2003), translated for the first time into the BMA. We show that; 1) these motifs are easily and fully translatable from continuous to discrete models, 2) Combining these motifs in a computationally naïve way generates a fully functional and predictive model of the yeast cell cycle.

(169 words)

75

76

77

78

## 79 INTRODUCTION

80 We are in an era of ever-increasing biological data. With data available from  
 81 genomic studies, through to metabolomic studies, the size, scale and  
 82 heterogeneity of the resources available present many triumphs in terms of  
 83 advancing high-throughput technologies but also many challenges. Despite  
 84 the enormous multitude of available data, our understanding of how such  
 85 information encoded in a cell's genome is used to carry out the complex  
 86 biological interactions found between genes and gene products is still lacking.  
 87 It is therefore no surprise that a central goal of modern biology in this post-  
 88 genomic era is to understand the structural and temporal nature of these  
 89 control networks. Not only would this allow us to translate 'Big Data' into  
 90 working models of biological systems, but also equip us with a better  
 91 understanding of biological mechanisms, allowing the exploration of emergent  
 92 behaviours and consequences of genomic variants, with an aim to develop  
 93 real-world hypotheses for experimental validation.

94

95 If we are to meet these challenges, new tools, techniques and ways of  
 96 working need to be adopted. Whilst experimental procedures using a  
 97 traditional reductionist approach, focusing on the study of individual proteins  
 98 or genes in isolation from other network interactions have proved useful in  
 99 uncovering specific elemental functions of various cellular mechanisms, many

disease processes continue to elude us. This has fuelled the growth of new lines of scientific inquiry. The wide-ranging, vast improvements in computing power brought about at the beginning of the twenty-first century has led biologists down the path of Systems Biology as a means to organise this biological data more holistically. This strategy therefore seeks to combine traditional biological thinking with more interdisciplinary, integrated, synthetic approaches allowing for larger-scale simulations of complex systems, which could revolutionise biomedical discovery.

Computational modelling therefore presents a powerful and novel approach to combat these challenges. The application of standard mathematical modelling, such as through stochastic or ordinary differential equations (ODEs), have been faithfully reproducing the interplay between genes and proteins in small regulatory networks with relative success. Prominent examples of ODE models include that of bacterial chemotaxis [1], the lactose operon control system in *Escherichia coli* [2] and the process of X chromosome inactivation [3], the cell cycle in yeast [4], and the generation of amyloid fibrils [5]. Such models employ complex kinetic equations to describe relationships between proteins or genes over time, and require highly accurate and intensive experimental data for their development as input. The complexity of such equations and experimental data required can provide a lot of dynamical detail however this complexity also begs the question of whether this approach will scale well when constructing much larger, more intricate networks in the future.

Executable modelling on the other hand, which describes biological systems as discrete systems, can provide a much simpler class of models [6]. Such models are immediately executable, allowing for much larger-scale simulations to be produced as well as providing the ability to undergo model checking and other formal verifications with ease [7–10]. One of the oldest and simplest forms of executable network models is based on Boolean states (logical models), where each node of the network represents a single gene or protein which is in one of two states: active/on (1) or inactive/off (0) [11,12]. Abstract models based on this paradigm have proved capable of forecasting dynamic processes. Clear examples include that of the control of segment polarity genes in *Drosophila* [13] or modelling of the neurotransmitter-signalling pathway between dopamine and glutamate receptors [14]. Yet the activities of cellular networks and signalling pathways are often subtler than this, which has resulted in various extensions being made to this model. One such refinement is *Qualitative Networks* (QNs), which uses discrete variables as opposed to Boolean states, and is able to model a much broader range of interactions by using algebraic target functions [7]. These target functions are composed of simple mathematical operations (e.g. addition, subtraction, division, multiplication) to allow for the generation of models with complex relationships between variables.

The BioModelAnalyzer (BMA) tool is a freely accessible online platform that creates QNs from user's instructions. These instructions are formed using a graphical interface, where different genes or proteins are represented by simple symbols that can be connected by inhibitory or activatory edges

150 negating the need for extensive experience in computer programming, logical  
151 formalisms or mathematical proofs [15]. As a result, the BMA is a highly  
152 accessible, unimposing interface that is suitable for experimental biologists,  
153 whilst still providing powerful stability checking, simulation and Linear  
154 Temporal Logic analysis abilities. Although on the surface BMA may appear to  
155 be highly abstract, elaborate biological functions can be robustly modelled  
156 such as that of *C. elegans* germline development [16], mammalian epidermis  
157 differentiation [7], gene and protein regulatory networks in chronic myeloid  
158 leukaemia (CML) [17] and acute myeloid leukaemia (AML) [18]. In the case of  
159 CML, a novel therapeutic strategy using an Imatinib and pan-Bcl2 family gene  
160 inhibitor combination has been identified, highlighting BMAs ability to work on  
161 either a hypothesis-creation or hypothesis-testing basis. Cell line specific  
162 differences in the PIM pathway were identified in the case of AML, leading to  
163 clinically relevant predictions about resistance and how to overcome it.

164

165 Although BMA provides the ability to encode complex dependencies between  
166 different genes or proteins via the use of algebraic target functions, this task  
167 can still seem quite onerous to many biologists. In 2003, Tyson, Chen and  
168 Novak [19] published a review outlining a concise mathematical vocabulary of  
169 common cellular interactions and pathways using ODEs. In their article, they  
170 identify a number of simple functional motifs, akin to electrical circuits which  
171 are found at the base of a variety of key biological processes and can be  
172 easily combined in order to model complex regulatory interactions. Here we  
173 outline a target function library which translates the ODEs outlined by Tyson  
174 et al. [19] into discrete equations encoded within nodes of a BMA model. In

175 order to investigate whether these target functions are capable of modelling  
176 cellular behaviours of greater complexity, we then created a BMA model of  
177 eukaryotic cell cycle regulation similar to Tyson et al [19]. *In silico* over-  
178 expression and knockouts of combinations of genes and genetic interactions  
179 were then carried out to highlight the sensitivity of our model. A key benefit of  
180 using discrete, executable modelling is that complex systems can be  
181 simulated and analysed, and experimentally testable hypotheses can be  
182 generated in the absence of large amounts of quantitative data required for  
183 ODE models.

184

185 This library of ODE translations to discrete target functions also complements  
186 the accessibility ethos behind the creation of the BMA. By providing simple  
187 building blocks that can be “plugged” into a set of specific nodes, much time  
188 and effort will be saved allowing biologists to construct elaborated valid  
189 models of biological phenomena, which can guide and direct hypotheses and  
190 ultimately drug treatments.

191

192

193

194

195

196

197

198

199



## RESULTS

### **A Target Function Library Accurately Reproduces Expected Biological Behaviour in Simple Networks**

We constructed QN models representing the ten major archetypal regulatory and signalling pathways. Networks were generated within the BMA, and signal/response curves compared to previous publications [19–23] for accuracy. Networks are represented by a series of nodes interconnected via activatory (i.e. generally increasing target node value), and inhibitory (generally decreasing target node value) relationships. Nodes in the system can contain values with a granularity of 5 (a range of 0-4), but are generally easily extrapolated to different system ranges. Full details are included in **Supplementary Table 1**, and all models are available in supplementary data.

#### **1. Linear Response**

A system where the signal-response is linear (i.e. an increasing signal gives a proportionally increasing response) can be accurately modelled using the default target function. A node with no specified target function will have its value calculated by:

$$\text{average}(\text{activating inputs}) - \text{average}(\text{inhibiting inputs})$$

A schematic linear signal-response network, from Tyson et al. [19] and built within the BMA is shown in **Fig 1, A, i & ii**, with signal-response curves from both systems shown in **Fig 1, A, iii & iv**.

224

225 **Fig 1. Comparison of Signal-Response Elements.** In this illustration, the  
 226 rows correspond to **(A)** linear response **(B)** hyperbolic response, **(C)** sigmoidal  
 227 response, **(D)** perfect adaption, **(E)** mutual inhibition, **(F)** mutual inhibition and  
 228 **(G)** homeostasis as in Tyson et al. [19] The columns correspond to **(i)** Tyson  
 229 et al. [19] wiring diagrams, **(ii)** BMA wiring diagram translation, **(iii)** Tyson et  
 230 al. [19] signal-response curves and **(iv)** BMA equivalent signal-response  
 231 curves. Each BMA wiring diagram contains a unique set of target functions  
 232 located within particular nodes of the network which can be found in  
 233 **Supplementary table 1**. For most cases clear comparison between Tyson et  
 234 al. [19] wiring diagrams (i) and the corresponding BMA wiring diagrams (ii)  
 235 can be made. Here like in Tyson et al. [19] S indicates the input Signal and R  
 236 indicates the output Response with, in our case, letters A-C representing  
 237 intermediate nodes. The graphs in (iv) are derived from simulation analysis  
 238 carried out in the BMA. For all cases bar (d- iv) and (g-iv) the signal is altered  
 239 from 0 through to 4 directly within the S node and the output in node R  
 240 recorded and subsequently plotted. For cases (d- iv) and (g-iv) a simulation is  
 241 run with a set signal input of 4 as an example, and the response output from  
 242 the BMA simulation plotted based on the response per calculation time step.  
 243 Graphs plotted from the BMA model (iv) can then be compared to ODE  
 244 counterpart (iii). In (e-iv) and (f-iv) the dashed line represents an unsteady  
 245 state. In (e-iv)  $S_{crit}$ , which is denoted x in our target function (**Supplementary**  
 246 **table 1**) represents the signal input where a switch in steady states will occur.  
 247 The motifs in each case reproduce the bifurcation as expected. Similarly, in (f-

iv)  $S_{crit1}$  which is denoted  $y$  in our target function and  $S_{crit2}$  which is denoted  $z$  in our target function also correspond to the switch points in stable states.

## 2. Hyperbolic Response

We generated four ways to discretely model different hyperbolic functions within the BMA. This function describes a “phosphorylation and dephosphorylation” reaction and is modelled using a three-node wiring diagram shown in **Fig 1, B, ii**. A simple function included in node A results in a hyperbolic response as a result of a linearly increasing input. Node A contains the target function:

$$\text{ceil}\left(\left(\frac{3}{2}\right)(\text{var}(\text{signal}))\right)$$

Where  $\text{var}(\text{signal})$  represents the signal received by the network. This linear approximation captures the rapid initial growth of the response, whilst the plateau is enforced by the granularity of the variable. Additional modifiers (for details see **Supplementary Table 1**) can be included to change the shape and thresholds of the response. Hyperbolic signal-response curves from Tyson et al. [19] and from within the BMA are shown in **Fig 1, B, iii & iv**.

## 3. Sigmoidal Response

Sigmoidal response curves represent systems that act in a switch like manner, which are reversible and increase continuously with an increasing input. Schematics for sigmoidal signal-response networks are shown in **Fig 1, C, I & ii**. The target function for Node A contains the function describing the

272 sigmoidal response. Multiple functions produce differing sigmoidal curves (for  
273 details see **Supplementary Table 1**). The simplest, producing a sigmoidal  
274 response from a linear signal is:

275

$$\left( \text{floor} \left( \frac{\text{var}(\text{signal})}{x} \right) \right) y$$

276

277 Where  $x$  is the value at which the system switches between high and low  
278 values, and  $y$  is the upper value for the sigmoidal response. Signal-response  
279 curves are shown in **Fig 1, C, iii & iv**.

280

#### 281 **4. Perfect Adaptation Response**

282 Adaptation is defined as “a process where a system initially responds to a  
283 stimulus, but then returns to basal or near-basal levels of activity after some  
284 period of time” [24]. Perfect adaptation is further characterised by the final  
285 response of the network returning to the exact pre-stimulus level. Perfect  
286 adaptation is used in numerous biological systems, for example, the  
287 Friedlander and Brenner [25] model of ion channel activation and inactivation.  
288 Network schematics for perfect adaptation systems can be seen in **Fig 1, D, i**  
289 **& ii**. Perfect adaptation is modelled with the addition of the following target  
290 function to Node C (Signal-response curves can be seen in **Fig 1, D, iii & iv**):

291

$$\left( x(\text{var}(A)) \right) - \left( x(\text{var}(B)) \right)$$

292

293 Where  $x$  represents the maximal height of the response before the system  
294 adapts.

295

## 296 **5. Mutual Activation Response**

297 Mutual activation behaviour represents irreversible cell switches, i.e. a “point-  
298 of-no-return”. These discontinuous, one-way switches are typical of cell fate  
299 determination. Once a critical signal value ( $S_{crit}$ ) is reached, the response  
300 immediately increases to a high level. A critical feature of mutual activation  
301 networks is that the switch is irreversible i.e. if the signal increases beyond  
302  $S_{crit}$  and subsequently decreases, the response will not decrease. Network  
303 schematics for mutual activation systems are shown in **Fig 1, E, i & ii**.  
304 Inclusion of the following target function in Node A results in the signal-  
305 response curves shown in **Fig 1, E, iii & iv**:

306

$$floor\left(\frac{var(signal)}{x}\right) + var(C)$$

307 Where  $x$  is  $S_{crit}$  – the value at which the irreversible switch occurs.

308

## 309 **6. Mutual Inhibition Signal Response Curve**

310 Mutual inhibition differs from mutual activation in that these systems exhibit  
311 hysteresis; if the input decreases below a defined critical value, then the  
312 output will return to zero. Tyson et al. [19] describe this type of feedback as a  
313 “toggle switch”, where there are two defined critical values;  $S_{crit1}$  and  $S_{crit2}$ , at  
314 which point the response will shift from either upper or lower values to the  
315 opposite. This is simplified below:

$$S \geq S_{crit1} \rightarrow R = R_{max}$$

$$S \leq S_{crit2} \rightarrow R = R_{min}$$

$$S_{crit1} < S_{crit2}$$

316

317 Essentially, this works similarly to mutual activation, except if S is decreased  
318 below  $S_{crit2}$  then the switch will return to the inactive state. Our model is  
319 composed of 6 nodes and is compared to the “traditional” toggle switch  
320 schematic in **Fig 1, F, ii**. B is split into two separate nodes representing active  
321 and inactive states ( $B_{active}$ , and  $B_{inactive}$  respectively), and it is the interactions  
322 between these 2 states of B that give rise to hysteresis. The target function for  
323 the node representing inactive B (Node  $B_{inactive}$ ) in a system with a granularity  
324 of 0-4 is:

325

$$x \left( (var(A) + (4 - y)) - var(B_{active}) \right)$$

326

327 Where  $x$  represents the maximal response of the network, and  $y$  is  $S_{crit1}$ . The  
328 target function for the node representing active B (Node  $B_{active}$ ) is:

329

$$(x - var(B_{inactive})) + (1 - z)$$

330

331 Where  $x$  represents the maximal response for the network, and  $z$  is  $S_{crit2}$ .

332 Additionally, Node C contains the following target function:

333

$$x(var(A) - var(B_{active}))$$

334

Where  $x$  represents the maximal response for the network. Signal-response curves for this network are shown in **Fig 1, E, iii & iv**.

## 7. Homeostasis

Homeostatic regulation involves a network where the network counteracts the activity of the stimulus such that the response is constrained to a very narrow window (in the case of our network, a single value). A schematic homeostasis network is shown in **Fig 1, F, I & ii**. In this network, the granularity of Node B is adjusted such that it is double the range of the other nodes within the system. This is required for stability of the system, as nodes can only alter by a single integer value each time step, a node of granularity 10 (0-9) will take twice as long to reach a maximal value from 0 as a node with a granularity of 5 (0-4). This temporal difference allows us to eliminate instability in the system caused by oscillatory feedback between Nodes A and B, which is present when both nodes have the same granularity. Within this network two unique target functions are required to exhibit homeostasis, for Node A:

$$var(signal) - floor\left(\frac{2}{3}var(B)\right) + 1$$

And for the node representing the system response (Node Response):

$$ceil\left(\frac{var(A)}{3}\right)$$

Signal-response curves can be seen in **Fig 1, F, iii & iv**.

357

## 358 **8. Negative Feedback Oscillations**

359 Negative feedback oscillations result from similar network wiring as  
360 homeostasis, with the result being a system where the response oscillates  
361 between 0 and the signal value.

362

363 A negative feedback oscillation loop is seen in **Fig 2, A**. No change in the  
364 default target functions are required to generate an oscillatory output. For  
365 these networks, an input of S will result in an oscillation that tends to between  
366 S and 0. The temporal constraints of the network however (in that each node  
367 can only update by a single integer value each step) results in cases where  
368 the oscillation will not reach the maximal value before the inhibitory portion of  
369 the network kicks in. The ultimate range of the oscillations can be tailored  
370 however, with either the addition of values to the output node (in order to  
371 adjust the oscillation range up or down), or by inserting the following formula  
372 into node A:

373

$$(var(signal) + x) - (var(C)) + y)$$

374

375 Where the difference between  $x$  and  $y$  changes the range of the oscillations.  
376 Additionally, the temporal properties of the system, specifically how long it  
377 takes to perform each loop, can be adjusted by the addition of more nodes to  
378 the loop, with a large number of nodes increasing the number of steps  
379 required to complete one oscillation. For an example see **Supplementary**  
380 **Figure 1.**



**Fig 2. Comparison of Oscillatory Networks.** In this illustration, the rows correspond to **(A)** negative feedback, **(B)** activator-inhibitor and **(C)** substrate-depletion oscillators as in Tyson et al. [19] The columns correspond to **(i)** Tyson et al. [19] wiring diagrams, **(ii)** BMA wiring diagram translation, **(iii)** Tyson et al. [19] signal-response curves and **(iv)** BMA equivalent signal-response curves. Each BMA wiring diagram contains a unique set of target functions located within particular nodes of the network which can be found in **Supplementary table 1**. For most cases clear comparison between Tyson et al. [19] wiring diagrams (i) and the corresponding BMA wiring diagrams (ii) can be made. Here like in Tyson et al. [19] S indicates the input Signal and R indicates the output Response with, in our case, letters A-E representing intermediate nodes. The graphs in (iv) are derived from simulation analysis carried out in the BMA. For all cases bar a simulation is run with a set signal input of 2 as an example, and the response output from the BMA simulation plotted based on the response per calculation time step and are thus not directly comparable, however clear oscillatory behaviour can still be observed.

## 9. Activator-Inhibitor Oscillations

The activator-inhibitor oscillation relationship is characterised by a positive and negative feedback loop within a system (shown in **Fig 2, B, i and ii**). The interactions of the two loops result in a system that oscillates between a maximal and minimal value, called a hysteresis oscillator. Including the following formula in node A results in an oscillation between the maximal and minimal values of the nodes when  $I = 2$ :

406

$$\left(x(\text{var}(\text{signal}) - (\text{var}(E) + y))\right) + \text{var}(A)$$

407

408 Where  $x$  is 3 value of the nodes, and  $y$  is 0. Adjusting these values will  
409 change the range of the oscillations (i.e a range of 3 or 2 is obtained by  
410 reducing the value of  $x$ ), and altering the value of  $y$  adjusts the start and end  
411 points of the oscillation. The signal-response curves for activator-inhibitor  
412 networks are shown in **Fig 2, B, iii and iv**).

413

## 414 **10. Substrate-Depletion Oscillations**

415

416 The substrate depletion oscillation (SDOs) is quite similar to that of negative  
417 feedback. However, the number of nodes are reduced to reflect the greater  
418 intimacy between enzyme-substrate reactions compared to negative feedback  
419 loops. The network schematics for substrate-depletion oscillations are shown  
420 in **Fig 2, C, i**. In substrate-depletion oscillations, a small signal produces a  
421 small response and a large signal produces a large response. To model this,  
422 the following target function is applied to Node A:

423

$$1 + \left(\text{floor}\left(\frac{\text{var}(\text{signal})}{x}\right)\right) * \left(\left(\frac{y}{2}\right) * \text{var}(\text{signal})\right) - \left(\frac{z}{2} * \text{var}(B)\right)$$

424

425

426 Where  $x$  is the starting point of the oscillations and  $y$  and  $z$  are the range of  
427 the oscillations. Signal-response curves are presented in **Fig 2, C, ii**.

428

429 **Using the BMA Target Function Library to Construct Complex Networks:**

430 **Eukaryotic Cell Cycle Control**

431

432 After translating these motifs that were originally defined with ODEs to BMA  
433 models and their target functions, we then sought to determine the robustness  
434 of these motifs and their target functions by modelling a complex cellular  
435 behaviour: Eukaryotic cell cycle regulation. Based on the wiring diagram  
436 presented by Tyson et al. [19], a QN model was constructed using our own  
437 BMA target function library (**Fig 3, A**). Clear descriptions of the dynamics of  
438 cell cycle regulation can be found in the following review articles: Tyson,  
439 Csikasz-Nagy & Novak (2002) [22], Tyson & Novak (2015)[20] and  
440 Hochegger, Takeda & Hunt (2008) [26].

441

442 **Fig 3. Qualitative Network of Eukaryotic Cell Cycle Regulation. (A)** BMA  
443 Wiring diagram. The network is constructed around a central pool of the major  
444 cell cycle regulator cyclin dependent kinase (Cdk1) and its cyclin partner  
445 (cycB). This cell cycle transitions are triggered by changes in the Cdk1-cycB  
446 activity, which is regulated by a number of different components. CKI a cyclin  
447 kinase inhibitor and Wee1 kinase subunit inactive the Cdk1-cycB complex  
448 whereas the Cdc25 phosphatase activates the complex. Cdk1-cycB activity  
449 can also be destroyed via the Anaphase-promoting complex (APC) in  
450 combination with Cdc20, which target cyclin for degradation. The activities of  
451 the Cdk1-cycB activity can then be monitored by 3 extracellular markers; G1S,  
452 G2M and MG1. **(B)** BMA simulation of Cdk1-cycB activity. The solid black line

453 indicates the progression of Cdk1-cycB levels through the cycle. Dotted lines  
454 and block colours represent distinct phases as determined by the key. The  
455 cycle repeats itself if growth conditions remain favourable, as is represented in  
456 this simulation.

457

## 458 **Pool Module**

459 This module contains the “master molecules” of the cell cycle, that being  
460 cyclin-dependent kinases (Cdks) and their cyclin partner, which as the name  
461 suggests are required in order to activate the Cdks. Our model is limited to  
462 only a single Cdk-cyclin partnership, Cdk1-cycB for simplicity. This module is  
463 fuelled by the growth of cyclin levels which we assume can have unlimited  
464 binding capacity to Cdk1. Unlike cycB, intracellular Cdk1 concentration does  
465 not fluctuate throughout the cell cycle [27], we therefore model Cdk1 as being  
466 at a constant level which can accommodate the variations in cycB levels [20].

467

468

## 469 **G1/S Module**

470 The G1/S module features mutual inhibition between Cdk1-cycB and CKI.  
471 This feedback loop is described as a “toggle switch” and is modelled using our  
472 BMA mutual inhibition target function. Here we model CKI as being present at  
473 high levels in G1 by assigning it an initial value of 10 (max based on our  
474 granularity choice). The input in this case is labelled as cyclin, which, as it  
475 increases causes an increase in bound\_Cdk1 (i.e. heterodimer of CKI, Cdk1 &  
476 cycB) due to the initial high levels of CKI. As the CKI doesn’t stop cyclin  
477 accumulation and binding to Cdk molecules, the rising Cdk1-cycB levels

which are not opposed by CKIs soon tips the balance, phosphorylating the CKI and labelling them for degradation. The values chosen for the switch points can be found in **Supplementary table 2**.

## **G2/M Module**

Following the degradation of CKI and subsequent spike in Cdk1-cycB activity the cycle enters the G2/M module. This module features both mutual activation, between Cdk1-cycB and Cdc25, and mutual inhibition between Cdk1-cycB and Wee1 [19]. The later works in a similar way to that of Ck1-cycB and CKI, with a race occurring being between Cdk1-cycB and Wee1. The Cdk-cycB and Cdc25 mutual activation interaction on the other hand is a type of positive feedback loop, where Cdc25 and Cdk1-cycB activate each other rather than inhibit each other. This is modelled using our BMA mutual inhibition target function combined with the mutual activation target function. Here we model Wee1 as being present at high levels in G2/M by assigning it an initial value of 10. The input in this case comes from the G1\_Cdk1 levels, which as it increases causes an increase in phos\_Cdk1 (i.e. phosphorylated form of Cdk1-cycB) due to the initial high levels of Wee1. As Wee1 does not stop cyclin accumulation and binding to Cdk molecules, the rising Cdk1-cycB levels (which are not opposed by Wee1) soon tips the balance, phosphorylating the Wee1 and marking them as inactive. Inactive Wee1 maintains active Cdc25, thus decreasing Wee1 results in an increase in Cdc25 and thus the switch like activation of Cdk1-cycB. Again, the values chosen for the switch points can be found in **Supplementary table 2**.

## 503 **M/G1 Module**

504 Once the Cdk1-cycB reaches a high level due to Cdc25 activation the cell  
 505 enters mitosis. In order to exit this phase, the Cdk1-cycB activity must be  
 506 destroyed and CKI levels stockpiled. This transition is aided by the  
 507 Cdc20:APC complex, which itself is indirectly activated by Cdk1-cycB activity,  
 508 causing degradation of CycB. This results in a substantial drop in Cdk1-cycB  
 509 activity, which then allows CKI to rise again. This relationship is described as  
 510 an oscillator based on a negative feedback loop, where Cdk1-cycB activates  
 511 APC, which activates Cdc20, which then degrades CycB [19]. In the BMA,  
 512 the negative feedback oscillators target function uses the default function.  
 513 Therefore this was modelled simply by considering the whole cycle as a  
 514 feedback loop by adding an inhibitory edge back to the cyclin B in order to  
 515 create the desired response (**Supplementary table 2 & 3**).

516

## 517 **Comparison to ODE Eukaryotic Cell Cycle Model Predictions**

518

519 The initial conditions were set so that all nodes remained with an initial value  
 520 of 0, except for CKI and Wee1 which are given an initial value of 10 (max  
 521 based on our granularity choice). As Growth, Replicated\_DNA,  
 522 Undamaged\_DNA and Aligned\_Chromosomes are conditions that can be  
 523 represented by a binary value, a value of 0 represents the absence of the cell  
 524 phenotype, whereas a value of 1 corresponds to the presence of the  
 525 phenotype. The initial values for all four of these phenotypes were therefore  
 526 set to 1 to represent normal growth conditions. Simulation analysis, starting  
 527 from this initial state leads to the initiation of a series of network states

(ranging between 0 and 10 based on our granularity). These steps correspond to the biological time series of protein activation and inactivation that occur during the wild-type cell cycle (**Fig 3, B**).

531

Similar to the Tyson et al. [19] signal-response curve, **Fig 3, B** shows the cell progresses through the cycle via a number of steady states. Firstly, at low levels of Cdk1-cycB activity the cell will remain in G1. With increased growth it will eventually pass a critical point, resulting in the irreversible disappearance of G1. As the cell moves into the S phase the level of Cdk1-cycB continues to grow until it reaches an intermediate level (3 as determined by our target function). Here in the G2 phase the cell will continue to grow until it reaches the next critical threshold, where the G2 state will disappear. This gives rise to a large spike in Cdk1-cycB activity (driving the cell into mitosis) which then decreases as cycB is degraded by APC:Cdc20, signalling cell division and resetting the system for the next round of division. One added benefit of this model is its ability to continuously cycle, as highlighted in **Fig 3, B**.

544

**Simulation of Mutant Phenotypes Replicate Experimental Results Found**

**in the Literature**

547

In order to evaluate the accuracy of our model loss of function (KO) and over-expression (OP) mutations were carried out based on a sample of previous experiments found in the literature (**Table 1**). In our limited subset of mutant experiments 8 out of 9 cases were able to accurately replicate the experimental results found in the literature without making any modifications

to the underlying model described above beyond modelling the mutations (**Fig 4**). For instance in the case of Cdc25 OP, studies in both yeast and mice have shown that over-production of Cdc25 result in premature entry into mitosis due to early activation of Cdk1-cycB [28,29]. In the in silico experiment, the same result can be discerned. Rather than needing 8 steps to pass through G2 the Cdc25 OP, the model only takes one step. Similarly less time is spent in M phase with only 1 step occurring versus 2 steps for wild types (WT). This results in the mutant model undergoing each cycle in fewer calculation steps, needing only 33 steps compared to the 41 needed in the WT model. Descriptions of the other seven successfully reproduced experiments can be found in **Table 1**. For the case concerning the CKI OP mutant, experimental results were not as clearly reproduced. Experimental evidence by Moreno & Nurse [30] showed that overexpression of Rum1, a fission yeast CKI, leads to delays in G1, with repeated S-phase and no M-phase. This is partially replicated in our mutant model, with there being a long delay in G1 phase (23 calculation steps compared to 14 in the WT model), as well as no M phase being reached (where Cdk1-cycB hits max value of 10). The model however still runs through the M/G1 phase rather than just repeating the S phase.

571

**Table 1:** Mutant simulations reproduce described behaviour from the literature. Summary of experimental results are given in “Expected Outcome”, and in silico results are given in “Model Outcome”.

| Genetic Perturbation | Source                 | Expected Outcome                    | Model Output              |
|----------------------|------------------------|-------------------------------------|---------------------------|
| Wee1Δ                | Yeast - Nurse 1975[31] | Premature entry into mitosis, with  | G1 same length, Short G2, |
|                      | Mammal - Tominaga      | long G1, short G2, but still viable | cell cycles quicker       |



25

|                 |                                                           |                                                                    |                                            |
|-----------------|-----------------------------------------------------------|--------------------------------------------------------------------|--------------------------------------------|
|                 | 2006[32]                                                  |                                                                    |                                            |
| Wee1 OP         | Arabidopsis – De Schutter<br>2007[33]                     | Cell cycle blocked in G2                                           | Arrest in G2                               |
| CKIΔ            | Yeast – Lengronne<br>2002[34]                             | Short G1, extended G2, increased<br>activation of Cdk              | Short G1, extended G2                      |
| CKI OP          | Yeast – Moreno 1994[30]                                   | In yeast delays G1 followed by<br>multiple S & no M                | Long delay in G1, cycles but<br>no M phase |
| Wee1Δ<br>CKIΔ   | Yeast – Sveiczer 2000[35]                                 | Cell divides very quickly, cell gets<br>smaller with each division | Divisions occur over less time<br>steps    |
| Cdc25Δ          | Yeast – Russell 1986[28]<br>Mammal – Lee 2009[36]         | Cell cycle blocked in G2                                           | Arrest in G2                               |
| Wee1Δ<br>Cdc25Δ | Yeast – Davidich 2013[37]                                 | Cell not viable, cannot enter mitosis                              | Arrest in G2                               |
| Cdc25 OP        | Yeast – Russell 1986[28]<br>Mammal – Timofeev<br>2010[29] | Premature entry into mitosis, early<br>activation of Cdk-cyc       | Short G2, cell cycles quicker              |
| Cdc20Δ          | Yeast – Kim 1998[38]<br>Mammal – Li 2007[39]              | Lethal, cannot complete mitosis                                    | Arrest in M                                |

575

576 **Figure 4. Mutant Phenotype Simulation Analysis.** Depicts the temporal  
577 evolution of the network following perturbation of particular nodes. Each  
578 mutant perturbation can be compared to the wild type, which is listed first.  
579 Each distinct cell cycle phase is coloured coded according to the key  
580 provided. Each time step corresponds to each calculation step recoded in the  
581 BMA simulation which is exported as a CSV file.

582

583

584

585

586

587

588

589

590

591

592

## 593 **DISCUSSION**

594 We present a library of novel Qualitative Network modules that can accurately  
 595 replicate the biological behaviour of core, ubiquitous network motifs. We  
 596 generate and compare our library based on biological behaviours defined  
 597 previously [19], and confirm the modular nature of the library with the  
 598 generation of a model for the eukaryotic cell cycle produced using motifs from  
 599 the library. By simulating known genetic perturbations we further test this  
 600 novel qualitative eukaryotic cell cycle model, highlighting its capacity to  
 601 accurately replicate many well-known mutant phenotypes without the need for  
 602 explicit parameterisation, as would generally be needed for ODE models. This  
 603 study constitutes both a toolbox for biologists to construct elaborate networks  
 604 with ease, but also an example of its application to a relevant biological  
 605 system. The QN presented has much wider applications, with our working  
 606 model having the potential to be adapted in order to provide much more  
 607 dynamic details on the regulation of these core cell cycle components. Such  
 608 a model could then be utilised to provide new insights into cell cycle regulation  
 609 allowing the prediction of novel mutant phenotypes that have not been  
 610 previously investigated. Not only could this provide a more thorough  
 611 understanding of the underlying cell cycle regulatory principles, but also assist

in the identification of a host of mutants that contribute to cancers or other pathologies, potentially allowing for the generation of novel drug therapeutics [40]. Similarly, in compiling this simple, easy to use BMA target function library we hope to encourage experimentalists to adopt this type of QN modelling as part of mainstream biological research. This would offer a wealth of advantages in terms of consolidating what is known about large networks into concise descriptions, as well as by allowing the generation of novel predictions about systems in the absence of large amounts of data and thus help focus experimental design.

Through the construction of our BMA motif/target function library we have been able to capture the dynamic behaviours of simple cell signalling pathways. Although networks can be modelled using ODEs, with behaviours being predicted using numerical simulations, this requires more complex and harder-to-obtain biological data and may equally appear mathematically complex to many biologists. As shown through the analysis of a model of eukaryotic cell cycle regulation, a relatively simple QN model can capture many of the advanced dynamic features of ODE models, including multistability and bifurcations. Simulation analysis of the described model shows strong similarities to that of the quantitative biological signal response curve, first proposed by Stern & Nurse [41], which was based on the results of multiple Cdk and cyclin knockout experimental studies. Like our model, they described the cycle as having three distinctive phases of Cdk activity, with the Cdk1-cycB levels transitioning through the cell cycle via different levels or bifurcations [22,41]. These levels or bifurcations are representative of firstly a

637 stage of inactivity (G1) where Cdk activity remains low, secondly a stage of  
 638 moderate Cdk activity sufficient to trigger S phase, and lastly a stage of high  
 639 Cdk activity sufficient to initiate mitosis, all of which can be easily recognised  
 640 in our model simulation [41]. This ability to model varying levels of Cdk activity  
 641 sets our model apart from its Boolean counterparts, where only two levels of  
 642 detail (“on” or “off”) can be captured. Through simple manipulation of our  
 643 target functions we were also able to capture an extra layer of detail, by  
 644 allowing our model to continue cycling over unceasing divisions when  
 645 conditions remain favourable, a behaviour which has not always been  
 646 replicated in previous studies [19,37,42]. The addition of this extra layer of  
 647 complexity, showing sustained cell cycle oscillations, results in a model that is  
 648 more representative of the true clock-like oscillatory nature of the cell cycle  
 649 [43]. It is worth noting, however, that our model does not contain continuous,  
 650 biologically measurable values for components, and as such is limited in its  
 651 ability to interpret continuous experimental data.

652

653 As a means to further validate the model, loss of function and overexpression  
 654 mutants were simulated, with the simplicity and generality of the model limiting  
 655 the number of mutant phenotypes studies. Regardless of the simplification of  
 656 using discrete modelling to represent continuous protein concentrations and  
 657 interactions, the BMA model was capable of correctly modelling 8 out of 9  
 658 mutant phenotypes studied. All knockout mutations were correctly  
 659 reproduced, with the model capturing dynamic properties such as phase  
 660 length changes. For over-expression models, where the corresponding node  
 661 range is set to max-max, 90% of the OP mutants studied corresponded

662 accurately with experimental data, with CKI OP mutants being in partial  
663 agreement. This partial agreement is likely due to the minimalistic nature of  
664 our model, and could likely be overcome by using additional nodes to model  
665 the CKI interaction in more detail. Overall, the model produced using the BMA  
666 target function library accurately represents not only the WT regulation  
667 patterns of the general cell cycle control engine, but also the dynamic  
668 changes resulting from a number of mutants. This showcases our BMA target  
669 function library's ability to be easily manipulated in order to model complex  
670 networks. Of particular note is the ability of the method to accurately generate  
671 protein behaviour through the simple addition of target functions from different  
672 modules that act on the same proteins, as is the case with the Cdk1-CycB  
673 node in our QN. This ability to draw together simple motifs to create realistic  
674 and useful biological networks demonstrates the validity of the approach and  
675 the opportunities that executable modelling makes available.

676

677

678

679

680

681

682

683

684

685

686

687

688

689

## 690 **METHODS**

### 691 **Qualitative Networks**

692

693 Qualitative networks (QNs) are an extension of Boolean models. In Boolean  
 694 Networks, nodes are able to be in either an active (1), or inactive state (0),  
 695 and are connected via functions that describe the mathematical relationship  
 696 between them in an abstract way. Boolean Networks can be synchronous or  
 697 asynchronous, that is – they may update every node simultaneously when a  
 698 change is introduced in the system, or they can update in sequence from a  
 699 propagation point. Qualitative networks are analogous to a synchronous  
 700 Boolean Network, except that nodes are able to vary over a wide range of  
 701 discrete values (called a granularity). Simple networks may be represented as  
 702 Boolean, but Qualitative Networks may involve nodes with a greater range of  
 703 values. For example, a node may have a range of 0-2 (granularity 3), where a  
 704 value of 1 represents “normal activity” of an enzyme or gene product, and 0  
 705 and 2 represent low and high values respectively. This can be extended for  
 706 much larger granularities, for example 0-10, where 10 represents maximal  
 707 activity, and 0 represents minimal activity, with each discrete value in between  
 708 representing a different concentration.

709

710 Nodes within a Qualitative Network are associated with either activatory or  
 711 inhibitory relationships. Activatory relationships generally result in a response  
 712 being high when a stimulus is high, and inhibitory relationships result in a  
 713 response being low when a stimulus is high. Relationships between nodes are  
 714 controlled by simple mathematical functions that describe the value that a  
 715 node should represent, given its current inputs, and this function is called a  
 716 target function. The values of nodes within a Qualitative Network are updated  
 717 simultaneously when the network is simulated, and nodes will change their  
 718 values in order to reach their target function gradually – changing value by  
 719 only one each step. Due to the synchronous and defined nature of Qualitative  
 720 Networks, they are deterministic, and susceptible to formal verification  
 721 techniques. QN's can stabilize and reach a single self-perpetuating state  
 722 (called a stable point), but can also give rise to cycles and oscillations.  
 723 Models and motifs described in this document are available in supplementary  
 724 information and at [https://github.com/shorthouse-](https://github.com/shorthouse-mrc/biomodelanalyzer_targetfunctionlibrary)  
 725 [mrc/biomodelanalyzer\\_targetfunctionlibrary](https://github.com/shorthouse-mrc/biomodelanalyzer_targetfunctionlibrary).

## 726 **The BioModelAnalyzer (BMA) Platform**

727

728 The BMA is an accessible, publicly available ([www.biomodelanalyzer.org](http://www.biomodelanalyzer.org))  
 729 graphical tool for discrete modelling and analysis of Qualitative Networks. The  
 730 platform, with its user-friendly graphical interface, uses visual notations  
 731 familiar to specialists in biology. BMA models are constructed on a gridded  
 732 canvas upon which one or more cells, and cell elements (i.e. membrane  
 733 receptor, cellular proteins etc.) can be placed and connected together with  
 734 activatory or inhibitory links. To create a model, the user starts by dragging

735 and dropping a cell onto the gridded canvas. These cells have no functional  
736 role in the analysis, being purely a visual aid to assist model design clarity.  
737 Cell elements are then placed in or outside of these cells, which can represent  
738 internal proteins, external proteins or membrane bound receptors.  
739 Connections between these cell elements can then be made using activatory  
740 arrows or inhibitory bar-arrows. Each cell element can then be labelled  
741 accordingly, using the simple drop down menus and a finite value range  
742 assigned, with the BMA default being [0,1], or Boolean. This range may be  
743 altered to add different levels of concentration, for example a range of [0,2]  
744 may represent “low”, “normal” and “high” concentrations of a protein or gene.  
745 If the user does not specify a target function for a node, then the BMA assigns  
746 a default target function. The default target function assigned within the BMA  
747 is described as:

748

$$\text{average}(\text{activating inputs}) - \text{average}(\text{inhibiting inputs})$$

749

750 More complex target functions can be inserted for each node manually using  
751 an autocomplete function simplifying the use of correct syntax when  
752 referencing variables or using operators.

753

754 This underlying QN can then be analysed using simulation, stability analysis  
755 or Linear Temporal Logic tools each of which is accessible using the graphical  
756 interface. Simulation analysis shows the step-by-step execution of the model  
757 starting from a set point, based on either initial values specified by the user or  
758 a randomised start point. A graphical representation of all node values as they



759 update over a user-defined number of time steps is produced, as well as a  
760 table of the simulation progression values, which can be exported as a CSV  
761 file for further analysis. Stability analysis can be used to test general  
762 properties of the model. If a model, given all possible starting conformations,  
763 will always result in a same self-perpetuating state, it is considered stable, and  
764 the graphical interface presents the user with the “stable values”. If stability is  
765 not achieved, however, the interface presents whether the system results in  
766 bifurcations (can potentially end in multiple states depending on the starting  
767 conformation) or oscillations (results in an infinite cycle). More advanced  
768 queries can be asked using the Linear Temporal Logic (LTL) interface, which  
769 allows the user to define simple or complex temporal logic queries with a drag  
770 and drop interface. LTL queries will return True, True sometimes, False, and  
771 False sometimes responses to queries, and the interface allows the user to  
772 see examples of systems where the behaviour occurs.

773

### 774 **Cell Cycle Model Generation**

775

776 The model was composed of 3 main modules; G1/S, G2/M and M/G1 linked to  
777 a central node representing the level of Cdk1-cycB activity throughout the  
778 cycle. Each module was represented by a different cell in the BMA and  
779 labelled accordingly. The modules themselves were comprised of 6 key  
780 components namely; Cyclin, CKI, Wee1, Cdc25, APC and Cdc20, which  
781 regulate this Cdk1-cycB activity and thus the different cell cycle transitions  
782 (**Table 2**). These 6 components, modelled in their different chemical states  
783 (phosphorylated, active, inactive etc.) thus comprise a 20 node network,

including 4 cell behaviours and 3 descriptive nodes linked by 28 interactions  
(**Supplementary Table 2 & 3**). Three members of the BMA target function  
library were combined to create the cell cycle model, with the granularity set to  
11 (A range of 0-10). This granularity, which differs from the default of 5 in our  
target function library, was chosen to accommodate the varying levels of  
Cdk1-cycB activity required, and to allow for clearer analysis of mutant  
phenotypes. Modules were initially generated based on the wiring and target  
functions from the BMA target function library examples, which were linked  
together through appropriate nodes (**Supplementary Figure 2**). This method  
resulted in the creation of individual pools of Cdk1-cycB activity at the different  
cell cycle phases that fed into one central pool of Cdk1-cycB activity. To better  
represent the biological system, the model was then refined, by simply  
combining the Cdk1-cycB individual pool target functions into a single node  
via compound addition of each target function within the target function  
interface. To allow for multiple rounds of cell division, rather than the  
simulation of a single cell cycle, modification to the mutual activation target  
function was required. The mutual activation target function defines a one-way  
switch, and as such is not reversible. Here only nodes S and A (see figure 1,  
e, ii) and their associated target functions were used, thus allowing the cell to  
return from the high state achieved following the critical switch point  
activation.

805

806

807 **Table 2:** Cross-species nomenclature of key nodes within each module

| Module | Target<br>Function   | Node  | Mammalian<br>Cells  | <i>Xenopus</i><br>embryo | Fission<br>Yeast | Budding<br>Yeast | Function                                                 |
|--------|----------------------|-------|---------------------|--------------------------|------------------|------------------|----------------------------------------------------------|
| G1/S   | Mutual<br>Inhibition | CKI   | p27 <sup>Kip1</sup> | Xic1                     | Rum1             | Sic1             | Stoichiometric cyclin-<br>dependent kinase inhibitor     |
| G2/M   | Mutual<br>Inhibition | Wee1  | hWee1               | Xwee1                    | Wee1             | Swe1             | Inhibitory kinase that<br>inactivate Cdk-cyclin dimer    |
|        | Mutual<br>Activation | Cdc25 | Cdc25C              | Xcdc25                   | Cdc25            | Mih1             | Activatory phosphatase that<br>activate Cdk-cyclin dimer |
| M/G1   | Negative<br>Feedback | APC   | APC                 | APC                      | APC              | APC              | Anaphase-promoting<br>complex                            |
|        | Oscillator           | Cdc20 | p55 <sup>Cdc</sup>  | Fizzy                    | Slp1             | Cdc20            | Degrades cyclin in complex<br>with APC                   |

808

809

810

811

812

### 813 **Knock-Out (KO) & Overexpression (OP) Analysis**

814

815 In order to show if a model can faithfully reproduce known biological

816 perturbations, loss of function and gain of function mutations can be analysed

817 in BMA. A list of genetic perturbations curated from the literature is created

818 and used to test the model. In the case of KO mutations, the corresponding

819 node within the model range was set to a range of 0-0, corresponding to a

820 permanently inactive state. OP mutations were simulated by setting the

821 corresponding node range to max-max, (i.e. max based on the chosen

822 granularity) simulating a permanently active state. Simulation analysis is then

823 carried out, and the results compared to the wild-type simulation. Differences  
824 were then compared to known biological behaviours.

825

## 826 **ACKNOWLEDGEMENTS**

827 We thank the Fisher and Hall groups for useful discussions. Work was  
828 supported by Medical Research Council core funding (D.S.) and Royal  
829 Society grant UF130039 (B.A.H).

830

## 831 **AUTHOR CONTRIBUTIONS**

832 BH, CB, NP and JF conceived the study. DS and MP generated the target  
833 function library, YP developed the model of the cell cycle. DS and YP co-  
834 wrote the manuscript. All authors were responsible for editing of the  
835 manuscript.

836

## 837 **COMPETING FINANCIAL INTEREST**

838 The authors declare no competing financial interest.

839

## 840 **REFERENCES**

- 841 1. Yi TM, Huang Y, Simon MI, Doyle J. Robust perfect adaptation in  
842 bacterial chemotaxis through integral feedback control. Proc Natl Acad  
843 Sci. 2000;97: 4649–53. doi:10.1073/pnas.97.9.4649
- 844 2. Esmaili A, Davison T, Wu A, Alcantara J, Jacob C. PROKARYO: an  
845 illustrative and interactive computational model of the lactose operon in  
846 the bacterium Escherichia coli. BMC Bioinformatics. 2015;16: 311.  
847 doi:10.1186/s12859-015-0720-z

- 848 3. Webb C, Wang J. Cell Systems A self-enhanced transport mechanism  
849 through long noncoding RNAs for X chromosome inactivation. Nat Publ  
850 Gr. Nature Publishing Group; 2016;6: 1–12. doi:10.1038/srep31517
- 851 4. Chen KC, Calzone L, Csikasz-Nagy A, Cross FR, Novak B, Tyson JJ.  
852 Integrative analysis of cell cycle control in budding yeast. Mol Biol Cell.  
853 American Society for Cell Biology; 2004;15: 3841–62.  
854 doi:10.1091/mbc.E03-11-0794
- 855 5. Ortega F, Stott J, Visser SAG, Bendtsen C. Interplay between  $\alpha$ -,  $\beta$ -,  
856 and  $\gamma$ -secretases determines biphasic amyloid- $\beta$  protein level in the  
857 presence of a  $\gamma$ -secretase inhibitor. J Biol Chem. American Society for  
858 Biochemistry and Molecular Biology; 2013;288: 785–92.  
859 doi:10.1074/jbc.M112.419135
- 860 6. Fisher J, Henzinger TA. Executable cell biology. Nat Biotechnol. Nature  
861 Publishing Group; 2007;25: 1239–49. doi:10.1038/nbt1356
- 862 7. Schaub MA, Henzinger TA, Fisher J. Qualitative networks: a symbolic  
863 approach to analyze biological signaling networks. BMC Syst Biol.  
864 BioMed Central; 2007;1: 4. doi:10.1186/1752-0509-1-4
- 865 8. Clarke Edmund M., Grumberg O, Peled D. Model Checking. MIT Press;  
866 1999.
- 867 9. Fisher J, Piterman N, Hajnal A, Henzinger TA. Predictive Modeling of  
868 Signaling Crosstalk during *C. elegans* Vulval Development. PLoS  
869 Comput Biol. Public Library of Science; 2007;3: e92.  
870 doi:10.1371/journal.pcbi.0030092
- 871 10. Nusser-Stein S, Beyer A, Rimann I, Adamczyk M, Piterman N, Hajnal A,  
872 et al. Cell-cycle regulation of NOTCH signaling during *C. elegans* vulval

- 873 development. Mol Syst Biol. European Molecular Biology Organization;  
874 2012;8: 618. doi:10.1038/msb.2012.51
- 875 11. Kauffman SA. Metabolic stability and epigenesis in randomly  
876 constructed genetic nets. J Theor Biol. Academic Press; 1969;22: 437–  
877 467. doi:10.1016/0022-5193(69)90015-0
- 878 12. Glass L, Kauffman SA. The logical analysis of continuous, non-linear  
879 biochemical control networks. J Theor Biol. Academic Press; 1973;39:  
880 103–129. doi:10.1016/0022-5193(73)90208-7
- 881 13. Chaves M, Albert R, Sontag ED. Robustness and fragility of Boolean  
882 models for genetic regulatory networks. J Theor Biol. 2005;235: 431–  
883 449. doi:10.1016/j.jtbi.2005.01.023
- 884 14. Gupta S, Bisht SS, Kukreti R, Jain S, Brahmachari SK. Boolean network  
885 analysis of a neurotransmitter signaling pathway. J Theor Biol.  
886 2007;244: 463–469. doi:10.1016/j.jtbi.2006.08.014
- 887 15. Benque D, Bourton S, Cockerton C, Cook B, Fisher J, Ishtiaq S, et al.  
888 Bma: Visual Tool for Modeling and Analyzing Biological Networks.  
889 Springer, Berlin, Heidelberg; 2012. pp. 686–692. doi:10.1007/978-3-  
890 642-31424-7\_50
- 891 16. Hall BA, Piterman N, Hajnal A, Fisher J. Emergent Stem Cell  
892 Homeostasis in the C. elegans Germline Is Revealed by Hybrid  
893 Modeling. Biophys J. 2015;109: 428–438. doi:10.1016/j.bpj.2015.06.007
- 894 17. Chuang R, Hall BA, Benque D, Cook B, Ishtiaq S, Piterman N, et al.  
895 Drug Target Optimization in Chronic Myeloid Leukemia Using Innovative  
896 Computational Platform. Sci Rep. 2015;5: 8190. doi:10.1038/srep08190
- 897 18. Silverbush D, Grosskurth S, Wang D, Powell F, Gottgens B, Dry J, et al.

- 898 Cell-Specific Computational Modeling of the PIM Pathway in Acute  
899 Myeloid Leukemia. *Cancer Res. American Association for Cancer*  
900 *Research*; 2017;77: 827–838. doi:10.1158/0008-5472.CAN-16-1578
- 901 19. Tyson JJ, Chen KC, Novak B. Sniffers, buzzers, toggles and blinkers:  
902 Dynamics of regulatory and signaling pathways in the cell. *Current*  
903 *Opinion in Cell Biology*. 2003. pp. 221–231. doi:10.1016/S0955-  
904 0674(03)00017-6
- 905 20. Tyson JJ, Novák B. Models in biology: lessons from modeling regulation  
906 of the eukaryotic cell cycle. *BMC Biol. BMC Biology*; 2015;13: 46.  
907 doi:10.1186/s12915-015-0158-9
- 908 21. Csikász-Nagy A, Battogtokh D, Chen KC, Novák B, Tyson JJ. Analysis  
909 of a generic model of eukaryotic cell-cycle regulation. *Biophys J. The*  
910 *Biophysical Society*; 2006;90: 4361–79.  
911 doi:10.1529/biophysj.106.081240
- 912 22. Tyson JJ, Csikasz-Nagy A, Novak B. The dynamics of cell cycle  
913 regulation. *BioEssays. Wiley Subscription Services, Inc., A Wiley*  
914 *Company*; 2002. pp. 1095–1109. doi:10.1002/bies.10191
- 915 23. Tyson JJ, Chen K, Novak B. Network dynamics and cell physiology. *Nat*  
916 *Rev Mol Cell Biol. Nature Publishing Group*; 2001;2: 908–916.  
917 doi:10.1038/35103078
- 918 24. Ferrell JE. Perfect and near-perfect adaptation in cell signaling. *Cell*  
919 *Systems*. 2016. pp. 62–67. doi:10.1016/j.cels.2016.02.006
- 920 25. Friedlander T, Brenner N. Adaptive response by state-dependent  
921 inactivation. *Proc Natl Acad Sci. National Academy of Sciences*;  
922 2009;106: 22558–22563. doi:10.1073/pnas.0902146106

- 923 26. Hochegger H, Takeda S, Hunt T. Cyclin-dependent kinases and cell-  
924 cycle transitions: does one fit all? *Nat Rev Mol Cell Biol.* 2008;9: 910–  
925 916. doi:10.1038/nrm2510
- 926 27. Fisher DL, Nurse P. A single fission yeast mitotic cyclin B p34cdc2  
927 kinase promotes both S-phase and mitosis in the absence of G1 cyclins.  
928 *EMBO J.* European Molecular Biology Organization; 1996;15: 850–60.
- 929 28. Russell P, Nurse P. cdc25+ functions as an inducer in the mitotic control  
930 of fission yeast. *Cell.* Cell Press; 1986;45: 145–153. doi:10.1016/0092-  
931 8674(86)90546-5
- 932 29. Timofeev O, Cizmecioglu O, Settele F, Kempf T, Hoffmann I. Cdc25  
933 phosphatases are required for timely assembly of CDK1-cyclin B at the  
934 G2/M transition. *J Biol Chem.* American Society for Biochemistry and  
935 Molecular Biology; 2010;285: 16978–16990.  
936 doi:10.1074/jbc.M109.096552
- 937 30. Moreno S, Nurse P. Regulation of progression through the G1 phase of  
938 the cell cycle by the rum1+ gene. *Nature.* 1994;367: 236–242.  
939 doi:10.1016/0168-9525(94)90083-3
- 940 31. Nurse P. Genetic control of cell size at cell division in yeast. *Nature.*  
941 1975;256: 547–551. doi:10.1038/256547a0
- 942 32. Tominaga Y, Li C, Wang R-H, Deng C-X. Murine Wee1 plays a critical  
943 role in cell cycle regulation and pre-implantation stages of embryonic  
944 development. *Int J Biol Sci.* Ivyspring International Publisher; 2006;2:  
945 161–170.
- 946 33. De Schutter K, Joubès J, Cools T, Verkest A, Corellou F, Babiychuk E,  
947 et al. Arabidopsis WEE1 kinase controls cell cycle arrest in response to



- 948 activation of the DNA integrity checkpoint. *Plant Cell*. American Society  
949 of Plant Biologists; 2007;19: 211–225. doi:10.1105/tpc.106.045047
- 950 34. Lengronne A, Schwob E. The yeast CDK inhibitor Sic1 prevents  
951 genomic instability by promoting replication origin licensing in late G1.  
952 *Mol Cell*. 2002;9: 1067–1078. doi:10.1016/S1097-2765(02)00513-0
- 953 35. Sveiczzer A, Csikasz-Nagy A, Gyorffy B, Tyson JJ, Novak B. Modeling  
954 the fission yeast cell cycle: quantized cycle times in wee1- cdc25Delta  
955 mutant cells. *Proc Natl Acad Sci U S A*. National Academy of Sciences;  
956 2000;97: 7865–70. doi:10.1073/pnas.97.14.7865
- 957 36. Lee G, White LS, Hurov KE, Stappenbeck TS, Piwnica-Worms H.  
958 Response of small intestinal epithelial cells to acute disruption of cell  
959 division through CDC25 deletion. *Proc Natl Acad Sci U S A*. National  
960 Academy of Sciences; 2009;106: 4701–4706.  
961 doi:10.1073/pnas.0900751106
- 962 37. Davidich MI, Bornholdt S. Boolean Network Model Predicts Knockout  
963 Mutant Phenotypes of Fission Yeast. Csermely P, editor. *PLoS One*.  
964 Public Library of Science; 2013;8: e71786.  
965 doi:10.1371/journal.pone.0071786
- 966 38. Kim SH, Lin DP, Matsumoto S, Kitazono A, Matsumoto T. Fission yeast  
967 Slp1: an effector of the Mad2-dependent spindle checkpoint. *Science*.  
968 1998;279: 1045–1047. doi:10.1126/science.279.5353.1045
- 969 39. Li M, York JP, Zhang P. Loss of Cdc20 causes a securin-dependent  
970 metaphase arrest in two-cell mouse embryos. *Mol Cell Biol*. American  
971 Society for Microbiology (ASM); 2007;27: 3481–3488.  
972 doi:10.1128/MCB.02088-06

- 973 40. Sible JC, Tyson JJ. Mathematical modeling as a tool for investigating  
974 cell cycle control networks. *Methods*. 2007;41: 238–47.  
975 doi:10.1016/j.ymeth.2006.08.003
- 976 41. Stern B, Nurse P. A quantitative model for the cdc2 control of S phase  
977 and mitosis in fission yeast. *Trends in Genetics*. 1996. pp. 345–350.  
978 doi:10.1016/0168-9525(96)10036-6
- 979 42. Hong C, Lee M, Kim DD, Kim DD, Cho K-H, Shin I. A checkpoints  
980 capturing timing-robust Boolean model of the budding yeast cell cycle  
981 regulatory network. *BMC Syst Biol*. 2012;6: 129. doi:10.1186/1752-  
982 0509-6-129
- 983 43. Ferrell JE, Tsai TYC, Yang Q. Modeling the cell cycle: Why do certain  
984 circuits oscillate? *Cell*. 2011. pp. 874–885.  
985 doi:10.1016/j.cell.2011.03.006  
986  
987

## 988 SUPPLEMENTARY INFORMATION

989

990 **Supplementary Figure 1. Adjustment of Negative Feedback Oscillatory**  
991 **Module.** In this illustration, the rows correspond to **(A)** a one node system **(B)**  
992 a two node system and **(C)** three node system of negative feedback. The  
993 columns correspond to **(i)** the BMA wiring diagram translation and **(ii)** the  
994 BMA response curves. Each BMA wiring diagram contains a unique set of  
995 target functions located within particular nodes of the network which can be  
996 found in **Supplementary table 1**. S indicates the input Signal and R indicates  
997 the output Response with, in our case, letters A-D representing intermediate

998 nodes. The graphs in (ii) are derived from simulation analysis carried out in  
 999 the BMA. For all cases a simulation is run with a set signal input of 2 as an  
 1000 example, and the response output from the BMA simulation plotted based on  
 1001 the response per calculation time step. Comparison of the three different node  
 1002 length systems highlights that with increased number of nodes there is an  
 1003 increased length of oscillation response, as shown in the 20 calculation steps  
 1004 graphed, with the three node system **(C)** carrying out only 2 full oscillations  
 1005 compared to the one node system **(A)** which carries out 4 oscillations in the  
 1006 20 calculation steps.

1007

1008 **Supplementary Figure 2.** Wiring Diagram. Wiring diagram composed using  
 1009 the network topology specified from the BMA target function library modules.  
 1010 Cdk-cycB activity is subdivided into individual pools which link to a central  
 1011 Cdk1-cycB pool. Subsequent models combine the target functions of the G1  
 1012 Cdk-cycB activity and the G2-cdk-cycB activity together into one node which  
 1013 better represents the true biology.

1014 **Supplemental Table 1.** List of networks assessed in the manuscript. Paper  
 1015 reference refers to the figure in which the network occurs, included are the  
 1016 target functions for each node (if not the default), and comments. Included are  
 1017 the filenames and model names where the specific network can be found.

1018

1019 **Supplemental Table 2.** List of nodes in the network. Network ID refers to the  
 1020 internal label of the node. Full name is the common name found in the  
 1021 literature while Network Name is the name given in construction of model.

1022

1023 **Supplemental Table 3.** List of nodes in the network. Network ID refers to the  
 1024 internal label of the node. Full name is the common name found in the  
 1025 literature while Network Name is the name given in construction of model. The  
 1026 target function located in each node is found under the "Target Function"  
 1027 heading.

1028

1029 **Model Files.** We have additionally included all model files in .json format  
 1030 within an enclosed .zip file, they are also available at  
 1031 [https://github.com/shorthouse-mrc/biomodelanalyzer\\_targetfunctionlibrary](https://github.com/shorthouse-mrc/biomodelanalyzer_targetfunctionlibrary).

1032 Importing any file into the BMA will load the model and allow manipulation and  
 1033 simulation/stability analysis. Each file is named explicitly in Supplementary  
 1034 Table 1, with some files containing multiple models, which are referenced  
 1035 independently.

(i)

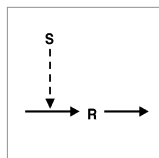

(ii)

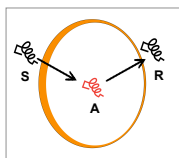

(iii)

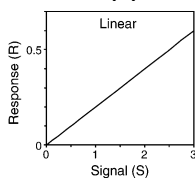

(iv)

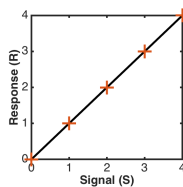

(B)

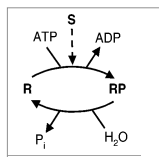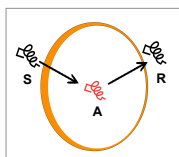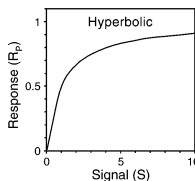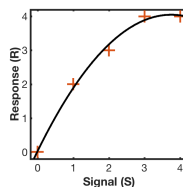

(C)

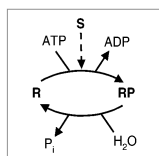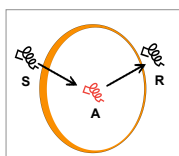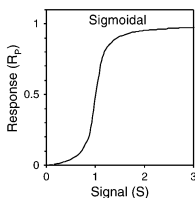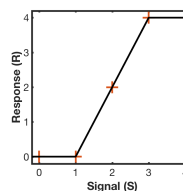

(D)

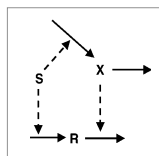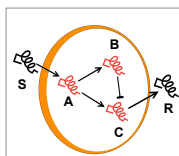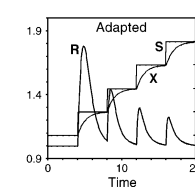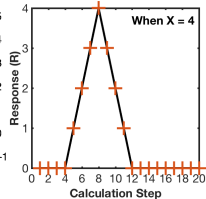

(E)

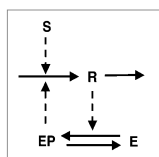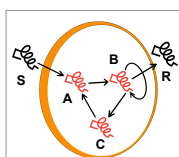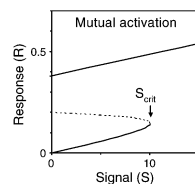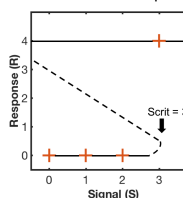

(F)

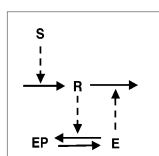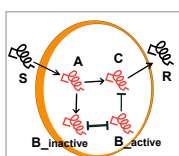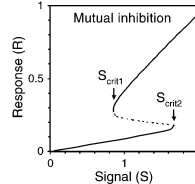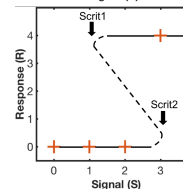

(G)

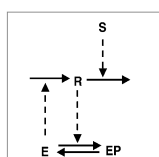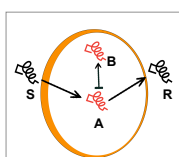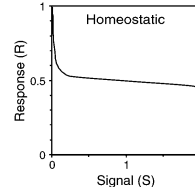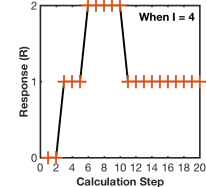

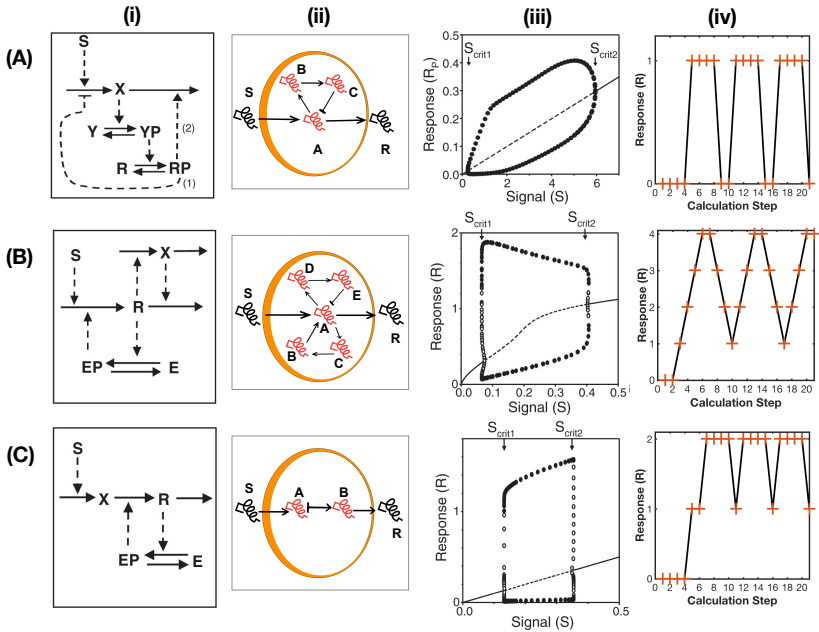

A)

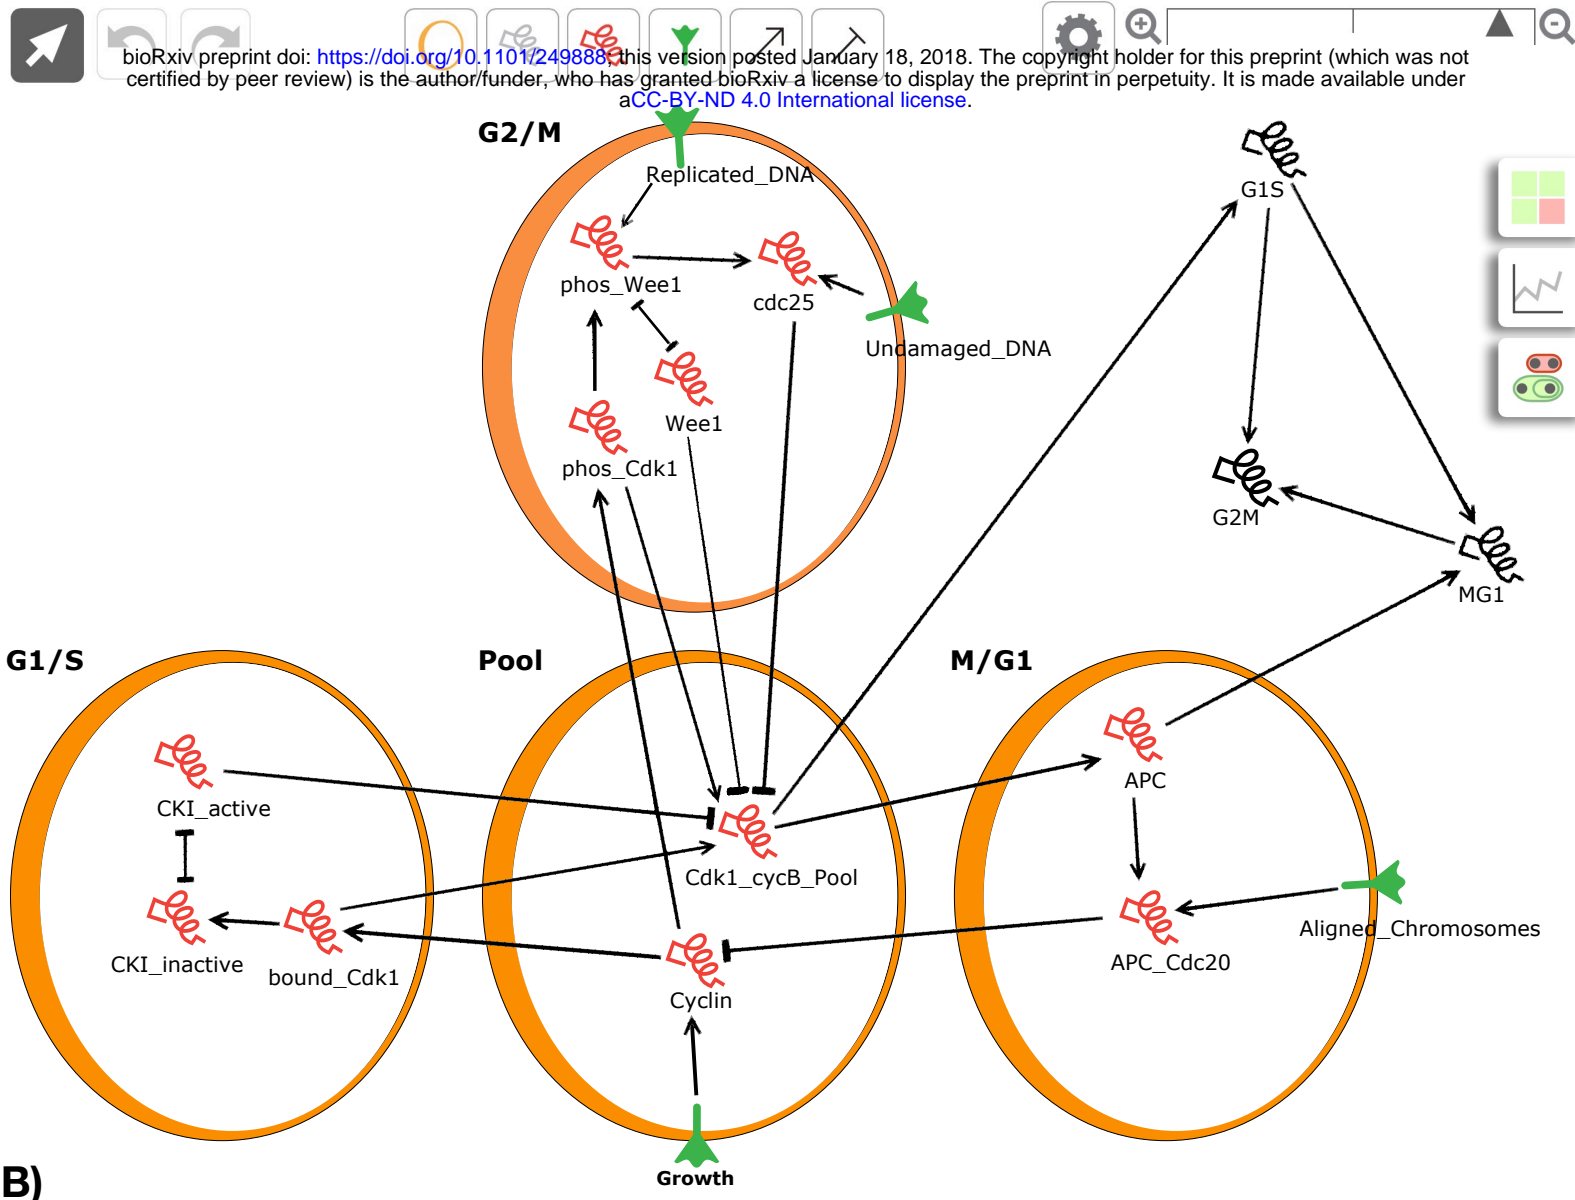

B)

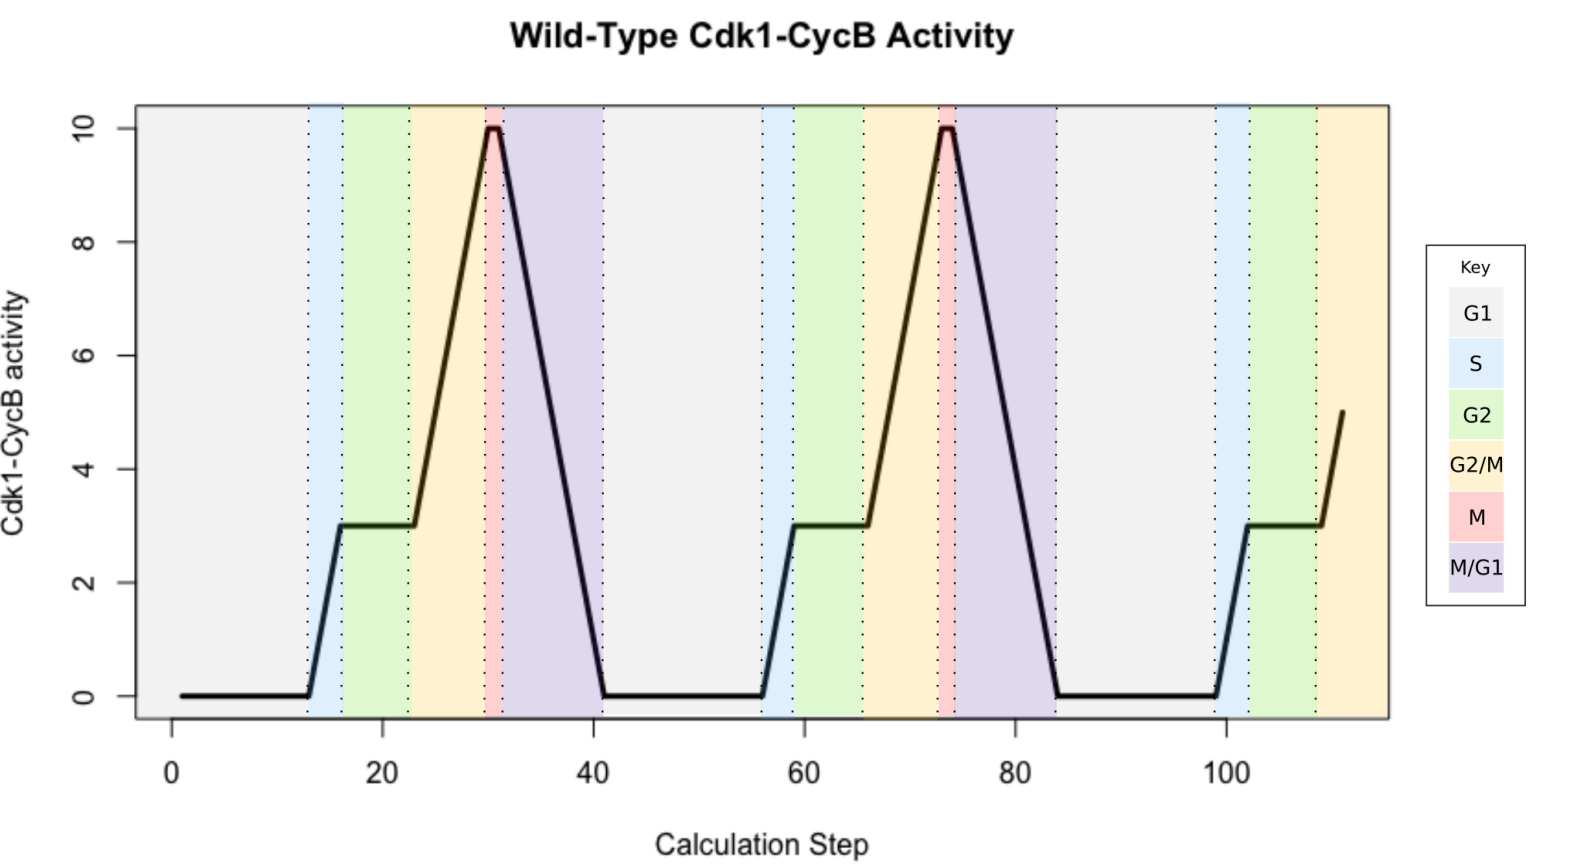

| Time Step |           | 1 | 2 | 3 | 4 | 5 | 6 | 7 | 8 | 9 | 10 | 11 | 12 | 13 | 14 | 15 | 16 | 17 | 18 | 19 | 20 | 21 | 22 | 23 | 24 | 25 | 26 | 27 | 28 | 29 | 30 | 31 | 32 | 33 | 34 | 35 | 36 | 37 | 38 | 39 | 40 | 41 | 42 | 43 | 44 | 45 | 46 | 47 | 48 | 49 | 50 | 51 | 52 | 53 | 54 | 55 | 56 | 57 | 58 | 59 | 60 | 61 |   |   |   |   |   |   |   |   |   |   |   |   |   |   |   |   |   |   |   |   |   |   |   |   |   |   |   |   |   |   |   |   |   |   |   |   |   |   |   |   |   |   |   |   |   |   |   |   |   |   |   |   |   |   |   |   |   |   |   |   |   |   |   |   |   |   |   |   |   |   |   |   |   |   |   |   |   |   |   |   |   |   |   |   |   |   |   |   |   |   |   |   |   |   |   |   |   |   |   |   |   |   |   |   |   |   |   |   |   |   |   |   |   |   |   |   |   |   |   |   |   |   |   |   |   |   |   |   |   |   |   |   |   |   |   |   |   |   |   |   |   |   |   |   |   |   |   |   |   |   |   |   |   |   |   |   |   |   |   |   |   |   |   |   |   |   |   |   |   |   |   |   |   |   |   |   |   |   |   |   |   |   |   |   |   |   |   |   |   |   |   |   |   |   |   |   |   |   |   |   |   |   |   |   |   |   |   |   |   |   |   |   |   |   |   |   |   |   |   |   |   |   |   |   |   |   |   |   |   |   |   |   |   |   |   |   |   |   |   |   |   |   |   |   |   |   |   |   |   |   |   |   |   |   |   |   |   |   |   |   |   |   |   |   |   |   |   |   |   |   |   |   |   |   |   |   |   |   |   |   |   |   |   |   |   |   |   |   |   |   |   |   |   |   |   |   |   |   |   |   |   |   |   |   |   |   |   |   |   |   |   |   |   |   |   |   |   |   |   |   |   |   |   |   |   |   |   |   |   |   |   |   |   |   |   |   |   |   |   |   |   |   |   |   |   |   |   |   |   |   |   |   |   |   |   |   |   |   |   |   |   |   |   |   |   |   |   |   |   |   |   |   |   |   |   |   |   |   |   |   |   |   |   |   |   |   |   |   |   |   |   |   |   |   |   |   |   |   |   |   |   |   |   |   |   |   |   |   |   |   |   |   |   |   |   |   |   |   |   |   |   |   |   |   |   |   |   |   |   |   |   |   |   |   |   |   |   |   |   |   |   |   |   |   |   |   |   |   |   |   |   |   |   |   |   |   |   |   |   |   |   |   |   |   |   |   |   |   |   |   |   |   |   |   |   |   |   |   |   |   |   |   |   |   |   |   |   |   |   |   |   |   |   |   |   |   |   |   |   |   |   |   |   |   |   |   |   |   |   |   |   |   |   |   |   |   |   |   |   |   |   |   |   |   |   |   |   |   |   |   |   |   |   |   |   |   |   |   |   |   |   |   |   |   |   |   |   |   |   |   |   |   |   |   |   |   |   |   |   |   |   |   |   |   |   |   |   |   |   |   |   |   |   |   |   |   |   |   |   |   |   |   |   |   |   |   |   |   |   |   |   |   |   |   |   |   |   |   |   |   |   |   |   |   |   |   |   |   |   |   |   |   |   |   |   |   |   |   |   |   |   |   |   |   |   |   |   |   |   |   |   |   |   |   |   |   |   |   |   |   |   |   |   |   |   |   |   |   |   |   |   |   |   |   |   |   |   |   |   |   |   |   |   |   |   |   |   |   |   |   |   |   |   |   |   |   |   |   |   |   |   |   |   |   |   |   |   |   |   |   |   |   |   |   |   |   |   |   |   |   |   |   |   |   |   |   |   |   |   |   |   |   |   |   |   |   |   |   |   |   |   |   |   |   |   |   |   |   |   |   |   |   |   |   |   |   |   |   |   |   |   |   |   |   |   |   |   |   |   |   |   |   |   |   |   |   |   |   |   |   |   |   |   |   |   |   |   |   |   |   |   |   |   |   |   |   |   |   |   |   |   |   |   |   |   |   |   |   |   |   |   |   |   |   |   |   |   |   |   |   |   |   |   |   |   |   |   |   |   |   |   |   |   |   |   |   |   |   |   |   |   |   |   |   |   |   |   |   |   |   |   |   |   |   |   |   |   |   |   |   |   |   |   |   |   |   |   |   |   |   |   |   |   |   |   |   |   |   |   |   |   |   |   |   |   |   |   |   |   |   |   |   |   |   |   |   |   |   |   |   |   |   |   |   |   |   |   |   |   |   |   |   |   |   |   |
|-----------|-----------|---|---|---|---|---|---|---|---|---|----|----|----|----|----|----|----|----|----|----|----|----|----|----|----|----|----|----|----|----|----|----|----|----|----|----|----|----|----|----|----|----|----|----|----|----|----|----|----|----|----|----|----|----|----|----|----|----|----|----|----|----|---|---|---|---|---|---|---|---|---|---|---|---|---|---|---|---|---|---|---|---|---|---|---|---|---|---|---|---|---|---|---|---|---|---|---|---|---|---|---|---|---|---|---|---|---|---|---|---|---|---|---|---|---|---|---|---|---|---|---|---|---|---|---|---|---|---|---|---|---|---|---|---|---|---|---|---|---|---|---|---|---|---|---|---|---|---|---|---|---|---|---|---|---|---|---|---|---|---|---|---|---|---|---|---|---|---|---|---|---|---|---|---|---|---|---|---|---|---|---|---|---|---|---|---|---|---|---|---|---|---|---|---|---|---|---|---|---|---|---|---|---|---|---|---|---|---|---|---|---|---|---|---|---|---|---|---|---|---|---|---|---|---|---|---|---|---|---|---|---|---|---|---|---|---|---|---|---|---|---|---|---|---|---|---|---|---|---|---|---|---|---|---|---|---|---|---|---|---|---|---|---|---|---|---|---|---|---|---|---|---|---|---|---|---|---|---|---|---|---|---|---|---|---|---|---|---|---|---|---|---|---|---|---|---|---|---|---|---|---|---|---|---|---|---|---|---|---|---|---|---|---|---|---|---|---|---|---|---|---|---|---|---|---|---|---|---|---|---|---|---|---|---|---|---|---|---|---|---|---|---|---|---|---|---|---|---|---|---|---|---|---|---|---|---|---|---|---|---|---|---|---|---|---|---|---|---|---|---|---|---|---|---|---|---|---|---|---|---|---|---|---|---|---|---|---|---|---|---|---|---|---|---|---|---|---|---|---|---|---|---|---|---|---|---|---|---|---|---|---|---|---|---|---|---|---|---|---|---|---|---|---|---|---|---|---|---|---|---|---|---|---|---|---|---|---|---|---|---|---|---|---|---|---|---|---|---|---|---|---|---|---|---|---|---|---|---|---|---|---|---|---|---|---|---|---|---|---|---|---|---|---|---|---|---|---|---|---|---|---|---|---|---|---|---|---|---|---|---|---|---|---|---|---|---|---|---|---|---|---|---|---|---|---|---|---|---|---|---|---|---|---|---|---|---|---|---|---|---|---|---|---|---|---|---|---|---|---|---|---|---|---|---|---|---|---|---|---|---|---|---|---|---|---|---|---|---|---|---|---|---|---|---|---|---|---|---|---|---|---|---|---|---|---|---|---|---|---|---|---|---|---|---|---|---|---|---|---|---|---|---|---|---|---|---|---|---|---|---|---|---|---|---|---|---|---|---|---|---|---|---|---|---|---|---|---|---|---|---|---|---|---|---|---|---|---|---|---|---|---|---|---|---|---|---|---|---|---|---|---|---|---|---|---|---|---|---|---|---|---|---|---|---|---|---|---|---|---|---|---|---|---|---|---|---|---|---|---|---|---|---|---|---|---|---|---|---|---|---|---|---|---|---|---|---|---|---|---|---|---|---|---|---|---|---|---|---|---|---|---|---|---|---|---|---|---|---|---|---|---|---|---|---|---|---|---|---|---|---|---|---|---|---|---|---|---|---|---|---|---|---|---|---|---|---|---|---|---|---|---|---|---|---|---|---|---|---|---|---|---|---|---|---|---|---|---|---|---|---|---|---|---|---|---|---|---|---|---|---|---|---|---|---|---|---|---|---|---|---|---|---|---|---|---|---|---|---|---|---|---|---|---|---|---|---|---|---|---|---|---|---|---|---|---|---|---|---|---|---|---|---|---|---|---|---|---|---|---|---|---|---|---|---|---|---|---|---|---|---|---|---|---|---|---|---|---|---|---|---|---|---|---|---|---|---|---|---|---|---|---|---|---|---|---|---|---|---|---|---|---|---|---|---|---|---|---|---|---|---|---|---|---|---|---|---|---|---|---|---|---|---|---|---|---|---|---|---|---|---|---|---|---|---|---|---|---|---|---|---|---|---|---|---|---|---|---|---|---|---|---|---|---|---|---|---|---|---|---|---|---|---|---|---|---|---|---|---|---|---|---|---|---|---|---|---|---|---|---|---|---|---|---|---|---|---|---|---|---|---|---|---|---|---|---|---|---|---|---|---|---|---|---|---|---|---|---|
| Mutation  | Wild Type | 0 | 0 | 0 | 0 | 0 | 0 | 0 | 0 | 0 | 0  | 0  | 0  | 0  | 1  | 2  | 3  | 3  | 3  | 3  | 3  | 3  | 3  | 3  | 3  | 4  | 5  | 6  | 7  | 8  | 9  | 10 | 10 | 9  | 8  | 7  | 6  | 5  | 4  | 3  | 2  | 1  | 0  | 0  | 0  | 0  | 0  | 0  | 0  | 0  | 0  | 0  | 0  | 0  | 0  | 0  | 0  | 0  | 1  | 2  | 3  | 3  | 3 | 3 |   |   |   |   |   |   |   |   |   |   |   |   |   |   |   |   |   |   |   |   |   |   |   |   |   |   |   |   |   |   |   |   |   |   |   |   |   |   |   |   |   |   |   |   |   |   |   |   |   |   |   |   |   |   |   |   |   |   |   |   |   |   |   |   |   |   |   |   |   |   |   |   |   |   |   |   |   |   |   |   |   |   |   |   |   |   |   |   |   |   |   |   |   |   |   |   |   |   |   |   |   |   |   |   |   |   |   |   |   |   |   |   |   |   |   |   |   |   |   |   |   |   |   |   |   |   |   |   |   |   |   |   |   |   |   |   |   |   |   |   |   |   |   |   |   |   |   |   |   |   |   |   |   |   |   |   |   |   |   |   |   |   |   |   |   |   |   |   |   |   |   |   |   |   |   |   |   |   |   |   |   |   |   |   |   |   |   |   |   |   |   |   |   |   |   |   |   |   |   |   |   |   |   |   |   |   |   |   |   |   |   |   |   |   |   |   |   |   |   |   |   |   |   |   |   |   |   |   |   |   |   |   |   |   |   |   |   |   |   |   |   |   |   |   |   |   |   |   |   |   |   |   |   |   |   |   |   |   |   |   |   |   |   |   |   |   |   |   |   |   |   |   |   |   |   |   |   |   |   |   |   |   |   |   |   |   |   |   |   |   |   |   |   |   |   |   |   |   |   |   |   |   |   |   |   |   |   |   |   |   |   |   |   |   |   |   |   |   |   |   |   |   |   |   |   |   |   |   |   |   |   |   |   |   |   |   |   |   |   |   |   |   |   |   |   |   |   |   |   |   |   |   |   |   |   |   |   |   |   |   |   |   |   |   |   |   |   |   |   |   |   |   |   |   |   |   |   |   |   |   |   |   |   |   |   |   |   |   |   |   |   |   |   |   |   |   |   |   |   |   |   |   |   |   |   |   |   |   |   |   |   |   |   |   |   |   |   |   |   |   |   |   |   |   |   |   |   |   |   |   |   |   |   |   |   |   |   |   |   |   |   |   |   |   |   |   |   |   |   |   |   |   |   |   |   |   |   |   |   |   |   |   |   |   |   |   |   |   |   |   |   |   |   |   |   |   |   |   |   |   |   |   |   |   |   |   |   |   |   |   |   |   |   |   |   |   |   |   |   |   |   |   |   |   |   |   |   |   |   |   |   |   |   |   |   |   |   |   |   |   |   |   |   |   |   |   |   |   |   |   |   |   |   |   |   |   |   |   |   |   |   |   |   |   |   |   |   |   |   |   |   |   |   |   |   |   |   |   |   |   |   |   |   |   |   |   |   |   |   |   |   |   |   |   |   |   |   |   |   |   |   |   |   |   |   |   |   |   |   |   |   |   |   |   |   |   |   |   |   |   |   |   |   |   |   |   |   |   |   |   |   |   |   |   |   |   |   |   |   |   |   |   |   |   |   |   |   |   |   |   |   |   |   |   |   |   |   |   |   |   |   |   |   |   |   |   |   |   |   |   |   |   |   |   |   |   |   |   |   |   |   |   |   |   |   |   |   |   |   |   |   |   |   |   |   |   |   |   |   |   |   |   |   |   |   |   |   |   |   |   |   |   |   |   |   |   |   |   |   |   |   |   |   |   |   |   |   |   |   |   |   |   |   |   |   |   |   |   |   |   |   |   |   |   |   |   |   |   |   |   |   |   |   |   |   |   |   |   |   |   |   |   |   |   |   |   |   |   |   |   |   |   |   |   |   |   |   |   |   |   |   |   |   |   |   |   |   |   |   |   |   |   |   |   |   |   |   |   |   |   |   |   |   |   |   |   |   |   |   |   |   |   |   |   |   |   |   |   |   |   |   |   |   |   |   |   |   |   |   |   |   |   |   |   |   |   |   |   |   |   |   |   |   |   |   |   |   |   |   |   |   |   |   |   |   |   |   |   |   |   |   |   |   |   |   |   |   |   |   |   |   |   |   |   |   |   |   |   |   |   |   |   |   |   |   |   |   |   |   |   |   |   |   |   |   |   |   |   |   |   |   |   |   |   |   |   |   |   |   |   |   |   |   |
|           | Wee1Δ     | 0 | 0 | 0 | 0 | 0 | 0 | 0 | 0 | 0 | 0  | 0  | 0  | 0  | 1  | 2  | 3  | 4  | 5  | 6  | 7  | 8  | 9  | 10 | 10 | 9  | 8  | 7  | 6  | 5  | 4  | 3  | 2  | 1  | 0  | 0  | 0  | 0  | 0  | 0  | 0  | 0  | 0  | 0  | 0  | 0  | 0  | 0  | 0  | 0  | 0  | 1  | 2  | 3  | 4  | 5  | 6  | 7  | 8  | 9  | 10 | 10 | 9 |   |   |   |   |   |   |   |   |   |   |   |   |   |   |   |   |   |   |   |   |   |   |   |   |   |   |   |   |   |   |   |   |   |   |   |   |   |   |   |   |   |   |   |   |   |   |   |   |   |   |   |   |   |   |   |   |   |   |   |   |   |   |   |   |   |   |   |   |   |   |   |   |   |   |   |   |   |   |   |   |   |   |   |   |   |   |   |   |   |   |   |   |   |   |   |   |   |   |   |   |   |   |   |   |   |   |   |   |   |   |   |   |   |   |   |   |   |   |   |   |   |   |   |   |   |   |   |   |   |   |   |   |   |   |   |   |   |   |   |   |   |   |   |   |   |   |   |   |   |   |   |   |   |   |   |   |   |   |   |   |   |   |   |   |   |   |   |   |   |   |   |   |   |   |   |   |   |   |   |   |   |   |   |   |   |   |   |   |   |   |   |   |   |   |   |   |   |   |   |   |   |   |   |   |   |   |   |   |   |   |   |   |   |   |   |   |   |   |   |   |   |   |   |   |   |   |   |   |   |   |   |   |   |   |   |   |   |   |   |   |   |   |   |   |   |   |   |   |   |   |   |   |   |   |   |   |   |   |   |   |   |   |   |   |   |   |   |   |   |   |   |   |   |   |   |   |   |   |   |   |   |   |   |   |   |   |   |   |   |   |   |   |   |   |   |   |   |   |   |   |   |   |   |   |   |   |   |   |   |   |   |   |   |   |   |   |   |   |   |   |   |   |   |   |   |   |   |   |   |   |   |   |   |   |   |   |   |   |   |   |   |   |   |   |   |   |   |   |   |   |   |   |   |   |   |   |   |   |   |   |   |   |   |   |   |   |   |   |   |   |   |   |   |   |   |   |   |   |   |   |   |   |   |   |   |   |   |   |   |   |   |   |   |   |   |   |   |   |   |   |   |   |   |   |   |   |   |   |   |   |   |   |   |   |   |   |   |   |   |   |   |   |   |   |   |   |   |   |   |   |   |   |   |   |   |   |   |   |   |   |   |   |   |   |   |   |   |   |   |   |   |   |   |   |   |   |   |   |   |   |   |   |   |   |   |   |   |   |   |   |   |   |   |   |   |   |   |   |   |   |   |   |   |   |   |   |   |   |   |   |   |   |   |   |   |   |   |   |   |   |   |   |   |   |   |   |   |   |   |   |   |   |   |   |   |   |   |   |   |   |   |   |   |   |   |   |   |   |   |   |   |   |   |   |   |   |   |   |   |   |   |   |   |   |   |   |   |   |   |   |   |   |   |   |   |   |   |   |   |   |   |   |   |   |   |   |   |   |   |   |   |   |   |   |   |   |   |   |   |   |   |   |   |   |   |   |   |   |   |   |   |   |   |   |   |   |   |   |   |   |   |   |   |   |   |   |   |   |   |   |   |   |   |   |   |   |   |   |   |   |   |   |   |   |   |   |   |   |   |   |   |   |   |   |   |   |   |   |   |   |   |   |   |   |   |   |   |   |   |   |   |   |   |   |   |   |   |   |   |   |   |   |   |   |   |   |   |   |   |   |   |   |   |   |   |   |   |   |   |   |   |   |   |   |   |   |   |   |   |   |   |   |   |   |   |   |   |   |   |   |   |   |   |   |   |   |   |   |   |   |   |   |   |   |   |   |   |   |   |   |   |   |   |   |   |   |   |   |   |   |   |   |   |   |   |   |   |   |   |   |   |   |   |   |   |   |   |   |   |   |   |   |   |   |   |   |   |   |   |   |   |   |   |   |   |   |   |   |   |   |   |   |   |   |   |   |   |   |   |   |   |   |   |   |   |   |   |   |   |   |   |   |   |   |   |   |   |   |   |   |   |   |   |   |   |   |   |   |   |   |   |   |   |   |   |   |   |   |   |   |   |   |   |   |   |   |   |   |   |   |   |   |   |   |   |   |   |   |   |   |   |   |   |   |   |   |   |   |   |   |   |   |   |   |   |   |   |   |   |   |   |   |   |   |   |   |   |   |   |   |   |   |   |   |   |   |   |   |   |   |   |   |   |   |   |   |   |   |   |   |   |   |   |   |
|           | Wee1 OP   | 0 | 0 | 0 | 0 | 0 | 0 | 0 | 0 | 0 | 0  | 0  | 0  | 0  | 1  | 2  | 3  | 3  | 3  | 3  | 3  | 3  | 3  | 3  | 3  | 3  | 3  | 3  | 3  | 3  | 3  | 3  | 3  | 3  | 3  | 3  | 3  | 3  | 3  | 3  | 3  | 3  | 3  | 3  | 3  | 3  | 3  | 3  | 3  | 3  | 3  | 3  | 3  | 3  | 3  | 3  | 3  | 3  | 3  | 3  | 3  | 3  | 3 | 3 | 3 | 3 | 3 |   |   |   |   |   |   |   |   |   |   |   |   |   |   |   |   |   |   |   |   |   |   |   |   |   |   |   |   |   |   |   |   |   |   |   |   |   |   |   |   |   |   |   |   |   |   |   |   |   |   |   |   |   |   |   |   |   |   |   |   |   |   |   |   |   |   |   |   |   |   |   |   |   |   |   |   |   |   |   |   |   |   |   |   |   |   |   |   |   |   |   |   |   |   |   |   |   |   |   |   |   |   |   |   |   |   |   |   |   |   |   |   |   |   |   |   |   |   |   |   |   |   |   |   |   |   |   |   |   |   |   |   |   |   |   |   |   |   |   |   |   |   |   |   |   |   |   |   |   |   |   |   |   |   |   |   |   |   |   |   |   |   |   |   |   |   |   |   |   |   |   |   |   |   |   |   |   |   |   |   |   |   |   |   |   |   |   |   |   |   |   |   |   |   |   |   |   |   |   |   |   |   |   |   |   |   |   |   |   |   |   |   |   |   |   |   |   |   |   |   |   |   |   |   |   |   |   |   |   |   |   |   |   |   |   |   |   |   |   |   |   |   |   |   |   |   |   |   |   |   |   |   |   |   |   |   |   |   |   |   |   |   |   |   |   |   |   |   |   |   |   |   |   |   |   |   |   |   |   |   |   |   |   |   |   |   |   |   |   |   |   |   |   |   |   |   |   |   |   |   |   |   |   |   |   |   |   |   |   |   |   |   |   |   |   |   |   |   |   |   |   |   |   |   |   |   |   |   |   |   |   |   |   |   |   |   |   |   |   |   |   |   |   |   |   |   |   |   |   |   |   |   |   |   |   |   |   |   |   |   |   |   |   |   |   |   |   |   |   |   |   |   |   |   |   |   |   |   |   |   |   |   |   |   |   |   |   |   |   |   |   |   |   |   |   |   |   |   |   |   |   |   |   |   |   |   |   |   |   |   |   |   |   |   |   |   |   |   |   |   |   |   |   |   |   |   |   |   |   |   |   |   |   |   |   |   |   |   |   |   |   |   |   |   |   |   |   |   |   |   |   |   |   |   |   |   |   |   |   |   |   |   |   |   |   |   |   |   |   |   |   |   |   |   |   |   |   |   |   |   |   |   |   |   |   |   |   |   |   |   |   |   |   |   |   |   |   |   |   |   |   |   |   |   |   |   |   |   |   |   |   |   |   |   |   |   |   |   |   |   |   |   |   |   |   |   |   |   |   |   |   |   |   |   |   |   |   |   |   |   |   |   |   |   |   |   |   |   |   |   |   |   |   |   |   |   |   |   |   |   |   |   |   |   |   |   |   |   |   |   |   |   |   |   |   |   |   |   |   |   |   |   |   |   |   |   |   |   |   |   |   |   |   |   |   |   |   |   |   |   |   |   |   |   |   |   |   |   |   |   |   |   |   |   |   |   |   |   |   |   |   |   |   |   |   |   |   |   |   |   |   |   |   |   |   |   |   |   |   |   |   |   |   |   |   |   |   |   |   |   |   |   |   |   |   |   |   |   |   |   |   |   |   |   |   |   |   |   |   |   |   |   |   |   |   |   |   |   |   |   |   |   |   |   |   |   |   |   |   |   |   |   |   |   |   |   |   |   |   |   |   |   |   |   |   |   |   |   |   |   |   |   |   |   |   |   |   |   |   |   |   |   |   |   |   |   |   |   |   |   |   |   |   |   |   |   |   |   |   |   |   |   |   |   |   |   |   |   |   |   |   |   |   |   |   |   |   |   |   |   |   |   |   |   |   |   |   |   |   |   |   |   |   |   |   |   |   |   |   |   |   |   |   |   |   |   |   |   |   |   |   |   |   |   |   |   |   |   |   |   |   |   |   |   |   |   |   |   |   |   |   |   |   |   |   |   |   |   |   |   |   |   |   |   |   |   |   |   |   |   |   |   |   |   |   |   |   |   |   |   |   |   |   |   |   |   |   |   |   |   |   |   |   |   |   |   |   |   |   |   |   |   |   |   |   |   |   |   |   |   |   |   |   |   |   |   |   |   |   |   |   |   |   |   |   |   |   |   |   |   |
|           | CKI Δ     | 0 | 0 | 0 | 0 | 1 | 2 | 3 | 3 | 3 | 3  | 3  | 3  | 3  | 3  | 3  | 3  | 3  | 3  | 3  | 3  | 3  | 3  | 3  | 3  | 4  | 5  | 6  | 7  | 8  | 9  | 10 | 10 | 9  | 8  | 7  | 6  | 5  | 4  | 3  | 2  | 1  | 0  | 0  | 0  | 0  | 0  | 0  | 0  | 0  | 0  | 1  | 2  | 3  | 3  | 3  | 3  | 3  | 3  | 3  | 3  | 3  | 3 | 3 | 3 | 3 | 3 | 3 | 3 | 3 | 3 | 3 | 3 | 3 | 3 | 3 | 3 | 3 | 3 | 3 | 3 | 3 | 3 | 3 | 3 | 3 | 3 | 3 | 3 | 3 | 3 | 3 | 3 | 3 | 3 | 3 | 3 | 3 | 3 | 3 | 3 | 3 | 3 | 3 | 3 | 3 | 3 | 3 | 3 | 3 | 3 | 3 | 3 | 3 | 3 | 3 | 3 | 3 | 3 | 3 | 3 | 3 | 3 | 3 | 3 | 3 | 3 | 3 | 3 | 3 | 3 | 3 | 3 | 3 | 3 | 3 | 3 | 3 | 3 | 3 | 3 | 3 | 3 | 3 | 3 | 3 | 3 | 3 | 3 | 3 | 3 | 3 | 3 | 3 | 3 | 3 | 3 | 3 | 3 | 3 | 3 | 3 | 3 | 3 | 3 | 3 | 3 | 3 | 3 | 3 | 3 | 3 | 3 | 3 | 3 | 3 | 3 | 3 | 3 | 3 | 3 | 3 | 3 | 3 | 3 | 3 | 3 | 3 | 3 | 3 | 3 | 3 | 3 | 3 | 3 | 3 | 3 | 3 | 3 | 3 | 3 | 3 | 3 | 3 | 3 | 3 | 3 | 3 | 3 | 3 | 3 | 3 | 3 | 3 | 3 | 3 | 3 | 3 | 3 | 3 | 3 | 3 | 3 | 3 | 3 | 3 | 3 | 3 | 3 | 3 | 3 | 3 | 3 | 3 | 3 | 3 | 3 | 3 | 3 | 3 | 3 | 3 | 3 | 3 | 3 | 3 | 3 | 3 | 3 | 3 | 3 | 3 | 3 | 3 | 3 | 3 | 3 | 3 | 3 | 3 | 3 | 3 | 3 | 3 | 3 | 3 | 3 | 3 | 3 | 3 | 3 | 3 | 3 | 3 | 3 | 3 | 3 | 3 | 3 | 3 | 3 | 3 | 3 | 3 | 3 | 3 | 3 | 3 | 3 | 3 | 3 | 3 | 3 | 3 | 3 | 3 | 3 | 3 | 3 | 3 | 3 | 3 | 3 | 3 | 3 | 3 | 3 | 3 | 3 | 3 | 3 | 3 | 3 | 3 | 3 | 3 | 3 | 3 | 3 | 3 | 3 | 3 | 3 | 3 | 3 | 3 | 3 | 3 | 3 | 3 | 3 | 3 | 3 | 3 | 3 | 3 | 3 | 3 | 3 | 3 | 3 | 3 | 3 | 3 | 3 | 3 | 3 | 3 | 3 | 3 | 3 | 3 | 3 | 3 | 3 | 3 | 3 | 3 | 3 | 3 | 3 | 3 | 3 | 3 | 3 | 3 | 3 | 3 | 3 | 3 | 3 | 3 | 3 | 3 | 3 | 3 | 3 | 3 | 3 | 3 | 3 | 3 | 3 | 3 | 3 | 3 | 3 | 3 | 3 | 3 | 3 | 3 | 3 | 3 | 3 | 3 | 3 | 3 | 3 | 3 | 3 | 3 | 3 | 3 | 3 | 3 | 3 | 3 | 3 | 3 | 3 | 3 | 3 | 3 | 3 | 3 | 3 | 3 | 3 | 3 | 3 | 3 | 3 | 3 | 3 | 3 | 3 | 3 | 3 | 3 | 3 | 3 | 3 | 3 | 3 | 3 | 3 | 3 | 3 | 3 | 3 | 3 | 3 | 3 | 3 | 3 | 3 | 3 | 3 | 3 | 3 | 3 | 3 | 3 | 3 | 3 | 3 | 3 | 3 | 3 | 3 | 3 | 3 | 3 | 3 | 3 | 3 | 3 | 3 | 3 | 3 | 3 | 3 | 3 | 3 | 3 | 3 | 3 | 3 | 3 | 3 | 3 | 3 | 3 | 3 | 3 | 3 | 3 | 3 | 3 | 3 | 3 | 3 | 3 | 3 | 3 | 3 | 3 | 3 | 3 | 3 | 3 | 3 | 3 | 3 | 3 | 3 | 3 | 3 | 3 | 3 | 3 | 3 | 3 | 3 | 3 | 3 | 3 | 3 | 3 | 3 | 3 | 3 | 3 | 3 | 3 | 3 | 3 | 3 | 3 | 3 | 3 | 3 | 3 | 3 | 3 | 3 | 3 | 3 | 3 | 3 | 3 | 3 | 3 | 3 | 3 | 3 | 3 | 3 | 3 | 3 | 3 | 3 | 3 | 3 | 3 | 3 | 3 | 3 | 3 | 3 | 3 | 3 | 3 | 3 | 3 | 3 | 3 | 3 | 3 | 3 | 3 | 3 | 3 | 3 | 3 | 3 | 3 | 3 | 3 | 3 | 3 | 3 | 3 | 3 | 3 | 3 | 3 | 3 | 3 | 3 | 3 | 3 | 3 | 3 | 3 | 3 | 3 | 3 | 3 | 3 | 3 | 3 | 3 | 3 | 3 | 3 | 3 | 3 | 3 | 3 | 3 | 3 | 3 | 3 | 3 | 3 | 3 | 3 | 3 | 3 | 3 | 3 | 3 | 3 | 3 | 3 | 3 | 3 | 3 | 3 | 3 | 3 | 3 | 3 | 3 | 3 | 3 | 3 | 3 | 3 | 3 | 3 | 3 | 3 | 3 | 3 | 3 | 3 | 3 | 3 | 3 | 3 | 3 | 3 | 3 | 3 | 3 | 3 | 3 | 3 | 3 | 3 | 3 | 3 | 3 | 3 | 3 | 3 | 3 | 3 | 3 | 3 | 3 | 3 | 3 | 3 | 3 | 3 | 3 | 3 | 3 | 3 | 3 | 3 | 3 | 3 | 3 | 3 | 3 | 3 | 3 | 3 | 3 | 3 | 3 | 3 | 3 | 3 | 3 | 3 | 3 | 3 | 3 | 3 | 3 | 3 | 3 | 3 | 3 | 3 | 3 | 3 | 3 | 3 | 3 | 3 | 3 | 3 | 3 | 3 | 3 | 3 | 3 | 3 | 3 | 3 | 3 | 3 | 3 | 3 | 3 | 3 | 3 | 3 | 3 | 3 | 3 | 3 | 3 | 3 | 3 | 3 | 3 | 3 | 3 | 3 | 3 | 3 | 3 | 3 | 3 | 3 | 3 | 3 | 3 | 3 | 3 | 3 | 3 | 3 | 3 | 3 | 3 | 3 | 3 | 3 | 3 | 3 | 3 | 3 | 3 | 3 | 3 | 3 | 3 | 3 | 3 | 3 | 3 | 3 | 3 | 3 | 3 | 3 | 3 | 3 | 3 | 3 | 3 | 3 | 3 | 3 | 3 | 3 | 3 | 3 | 3 | 3 | 3 | 3 | 3 | 3 | 3 | 3 | 3 | 3 | 3 | 3 | 3 | 3 | 3 | 3 | 3 | 3 | 3 | 3 | 3 | 3 | 3 | 3 | 3 | 3 | 3 | 3 | 3 | 3 | 3 | 3 | 3 | 3 | 3 | 3 | 3 | 3 | 3 | 3 | 3 | 3 | 3 | 3 | 3 | 3 | 3 | 3 | 3 | 3 | 3 | 3 | 3 | 3 | 3 | 3 | 3 | 3 | 3 | 3 | 3 | 3 | 3 | 3 | 3 | 3 | 3 | 3 | 3 | 3 | 3 | 3 | 3 | 3 | 3 | 3 | 3 | 3 | 3 | 3 | 3 | 3 | 3 | 3 | 3 | 3 | 3 | 3 | 3 | 3 | 3 | 3 | 3 | 3 | 3 | 3 | 3 | 3 | 3 | 3 | 3 | 3 | 3 | 3 | 3 | 3 | 3 | 3 | 3 | 3 | 3 | 3 | 3 | 3 | 3 | 3 | 3 | 3 | 3 | 3 | 3 | 3 | 3 | 3 | 3 | 3 | 3 | 3 | 3 | 3 | 3 | 3 | 3 | 3 | 3 | 3 | 3 | 3 | 3 | 3 | 3 | 3 | 3 | 3 | 3 | 3 | 3 | 3 | 3 | 3 | 3 | 3 | 3 | 3 | 3 | 3 | 3 | 3 | 3 | 3 |

Key:

|    |   |    |      |   |      |
|----|---|----|------|---|------|
| G1 | S | G2 | G2/M | M | M/G1 |
|----|---|----|------|---|------|



**(A)**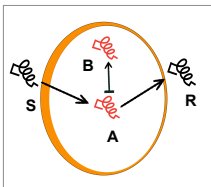**(ii)**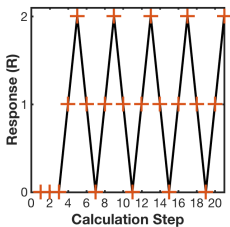**(B)**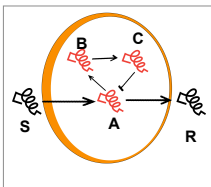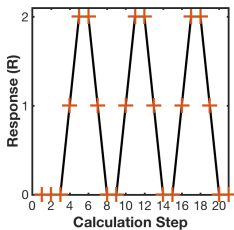**(C)**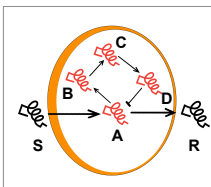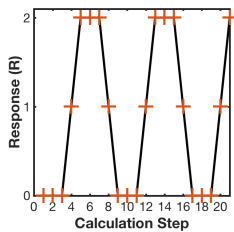

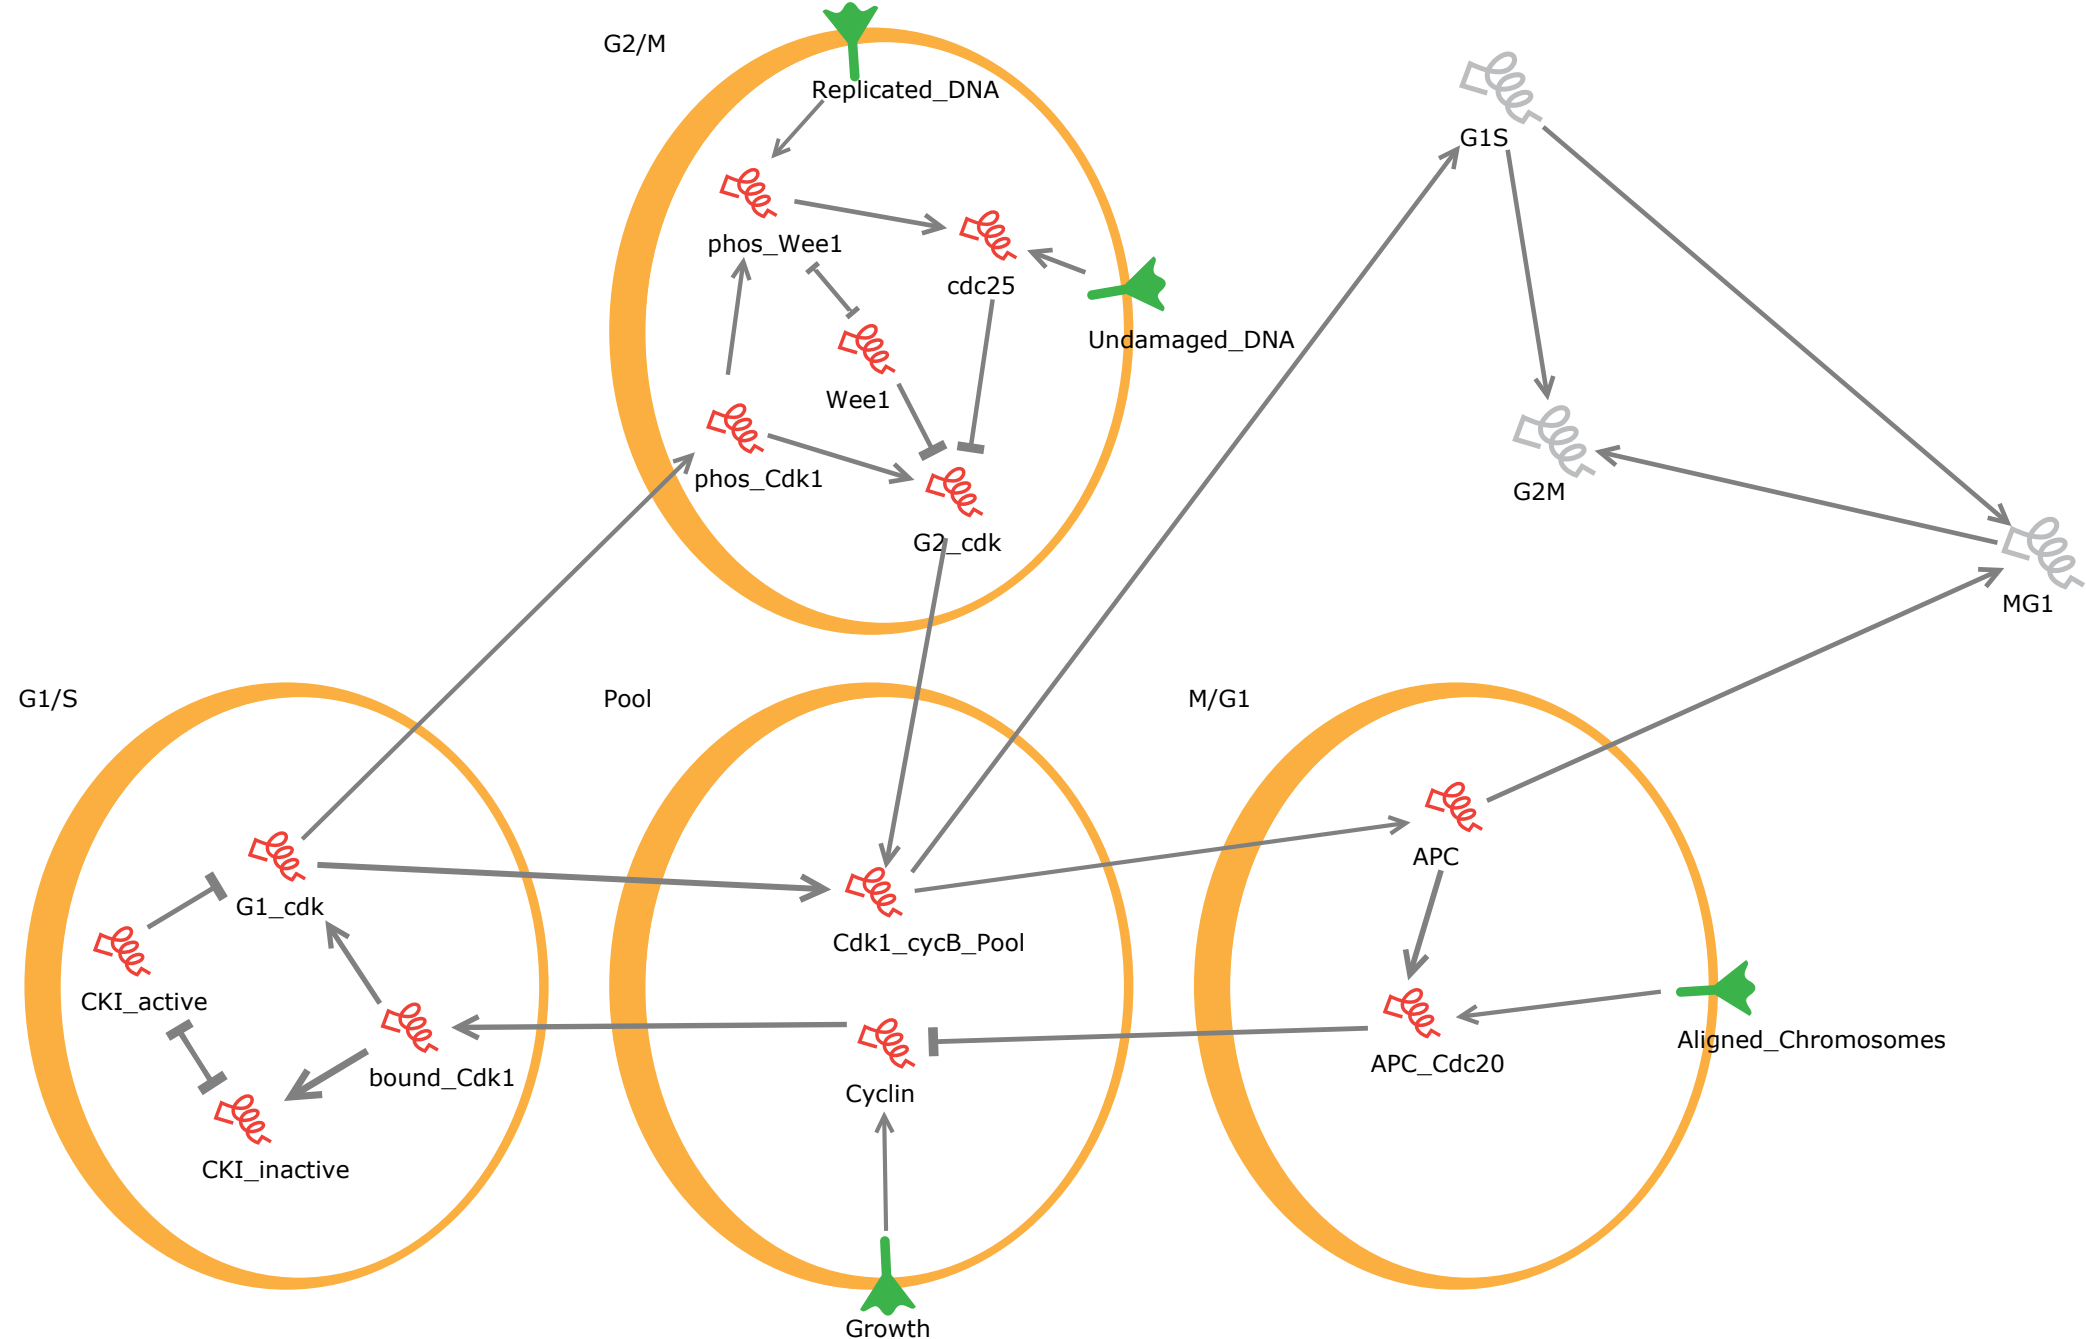

Source: https://www.biorxiv.org/content/10.1101/249888v1.full.pdf
